# Supplementary material for: Ancient viral genomes reveal introduction of human pathogenic viruses into Mexico during the transatlantic slave trade
Source: eLife journal article supplement (doi:10.7554/elife.68612), 2021-08-05
Supplement: supp [file elife-68612-supp-v1.zip]

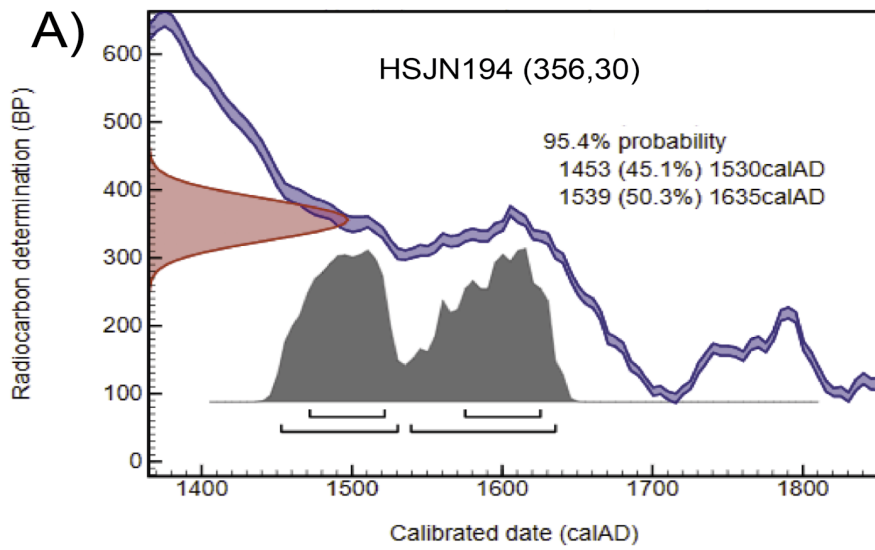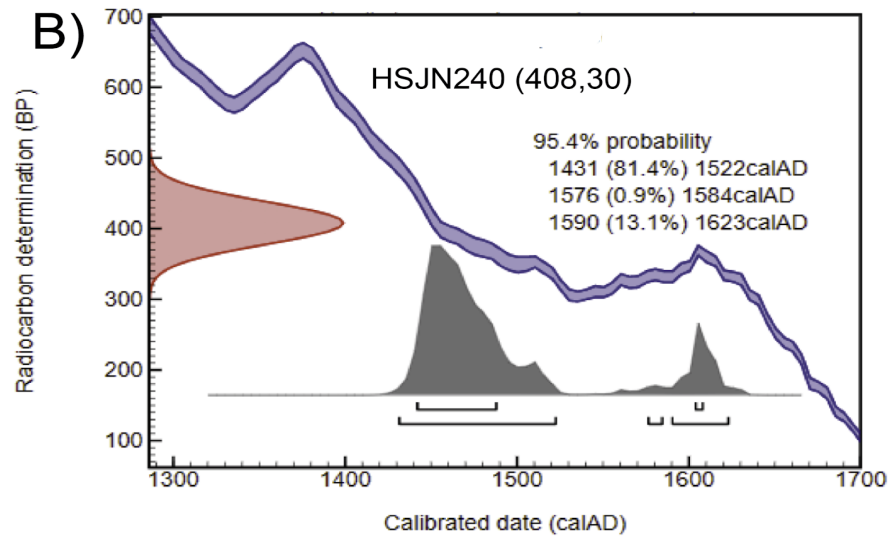

C)

| Sample  | <sup>14</sup> C Date<br>Years<br>(BP ± 1σ) | Calibrated date (Confidence Intervals) |                                    |
|---------|--------------------------------------------|----------------------------------------|------------------------------------|
|         |                                            | 1σ (68%)                               | 2σ (95%)                           |
| HSJN194 | 356 ± 30                                   | 479 – 325 cal BP<br>1472 - 1625 CE     | 498 - 315 BP<br>1453 - 1635 CE     |
| HSJN240 | 408 ± 30                                   | 509 – 343 cal BP<br>1442 - 1608 CE     | 519 - 328 cal BP<br>1431 - 1623 CE |
