# Supplementary material for: Ancient viral genomes reveal introduction of human pathogenic viruses into Mexico during the transatlantic slave trade
Source: eLife. 2021 Aug 5;10:e68612. doi: 10.7554/eLife.68612 (PMC8423449; doi:10.7554/eLife.68612)
Supplement: Supplementary file 1. — (A) Viral families included in customized capture design. Twenty-five whole genomes from different viruses were included in our customized capture design, as well as a selection of genes from Herpesviridae and Poxviridae (VARV). Raw or consensus sequences were used as described in Materials and methods. (B). Enrichment yield of HBV-like or B19V-like hits. The metagenomic analysis was carried out with MALT 0.4.0 based on the NCBI RefSeq Viral database, hits were normalized automatically between capture assay(s) and shotgun assay(s) per sample in MEGAN 6.8.0. HSJN177 was considered a negative control for capture based on the shotgun metagenomic analysis. Fold enrichment was calculated as (normalized target capture hits/normalized target shotgun hits). *Two independent NGS libraries were constructed (and then captured) from two different tooth samples belonging to the same individual. NA: not available. (C) . Mapping statistics for ancient viral genome reconstruction. Viral enriched NGS libraries were sequenced and mapped to the human genome (hg19); unmapped reads are shown as total sequences. Number of reads kept in subsequent steps of B19V (COYC4, HSJNC81, HSJN240) and HBV (HSJN194) genome reconstruction are shown as well (Materials and methods). *A second independent round of capture was sequenced deeper in order to obtain a better coverage of the targeted viral ancient genome. **A different tooth was used to construct an independent library for the same individual. #Coverage and depth calculated based on the B19V CDS (AB550331) or whole HBV genome (GQ331046). (C). BEAST analysis of B19V evolutionary rates and MRCA. Overview of B19V Bayesian evolutionary analyses with different molecular clock and priors used. (a) Comparison of median root age and substitution rates. (b) Comparison of MRCA per genotype. [file elife-68612-supp1.xlsx]

## Sheet: 1A
	Viral families included in customized capture design.
	Viral Family	Virus	Sequence	Reference	Length (kb)
	Poxviridae	Variola virus	30 genes	Consensus	36.44
	Hepadnaviridae	Hepatitis b virus	Genome	Consensus	3.26
	Parvoviridae	Human Adenoassociated virus 2	Genome	NC_001401.2	4.68
		Bocaviruses	Genome	Consensus	5.54
		Human Parvovirus B19	Genome	NC_000883.2	5.6
		Human Parvovirus B19 V9	Genome	NC_004295.1	5.03
	Herpesviridae	Herpes simplex virus 1	6 genes	NC_001806.1	17.54
		Cytomegalovirus	6 genes	NC_006273.1	14.85
		Epstein-Barr virus	7 genes	NC_009333.1	27.03
	Retroviridae	Lentivirus	Genome	Consensus	11.05
		Human foamyvirus	Genome	KX087159.1	11.95
	Papillomaviridae	Human papilomavirus 16	Genome	NC_001526.4	7.91
		Human papilomavirus 5	Genome	NC_001531.1	7.75
		Human papilomavirus 4	Genome	NC_001457.1	7.35
		Human papilomavirus 1	Genome	NC_001356.1	7.81
		Human papilomavirus 41	Genome	NC_001354.1	7.61
	Polyomaviridae	Human polyomavirus 9	Genome	NC_015150.1	5.03
		Human polyomavirus JC	Genome	NC_001699.1	5.13
		Human polyomavirus BK	Genome	NC_001538.1	5.15
		Human polyomavirus 6	Genome	NC_014406.1	4.93
	Circoviridae	Cyclovirus 1	Genome	KR902499.1	1.84
		Cyclovirus PK5034	Genome	GQ404845.1	1.78
		Cyclovirus NG12	Genome	GQ404854.1	1.79
		Cyclovirus NG14	Genome	GQ404855.1	1.79
		Cyclovirus VN	Genome	KF031466.1	1.85
		Cyclovirus VS	Genome	KC771281.1	1.83
		Cyclovirus PK5222	Genome	GQ404846.1	1.74
		Cyclovirus 10	Genome	KF726984.2	1.79
		Cyclovirus SL	Genome	KJ831064.1	1.71
	Total Length				217.77

## Sheet: 1B
	Enrichment yield of HBV-like or B19V-like hits.
	Virus	Sample	Shotgun hits	Capture 1 hits	Capture 2 hits	Fold Enrichment
	HBV	HSJN194	2	209	NA	104.5x
		HSJN177 (negative control)	0	3	NA	-
	B19V	HSJNC81	5	593	607	118.6-121.4x
		HSJN240	5/12*	591	594	49.5-118.2x
		COYC4	1	226	214	214-226x
		HSJN177 (negative control)	0	1	NA	-

## Sheet: 1C
	Mapping statistics for ancient viral genome reconstruction.
	Sample	Capture	Total sequences (not human)	Mapped BWA (DS1)	Mapped Blastn DS1 (>85% identity)	BWA+Blastn	Top hit (megablast nr NCBI)	Joined reads (all capture assays)	Without duplicates	Clonality (%)	%Coverage (bp >1 read) #	Average depth#
	COYC4	1	14044238	19	398	417	240	1397	537	0.615605	4022 nt (92.37)	3.84x
		2	7779292	21	1555	1576	509
		2*	24891885	17	5020	5037	651
	HSJNC81	1	10019005	136	4627	4763	2112	25536	1158	0.954652	4044 nt (92.88)	2.98x
		2	16319388	61	92177	92238	11152
		2*	31471775	46	183602	183648	12273
	HSJN240	1	15498735	125	29996	30121	4239	7928	1692	0.786579	4315 nt (99.1)	15.36x
		2**	5249840	170	18403	18573	3689
	HSJN194	1	11510961	10768	NA	NA	4381	4381	1215	0.722666	2896 nt (89.9)	30.8x

## Sheet: 1D
	BEAST analysis of B19V evolutionary rates and MRCA.
	a)
		Clock Model	Prior	Mean (95% HPD)
				Median root age in years	Median substitution rate (subs/site/year)	Likelihood	Posterior Probability
		Strict	Exponential	11282.97 (9952.19, 12684.59)	1.04E-5 (8.76E-6, 1.20E-5)	-28102.68 (-28120.24, -28085.31)	-29342.09 (-29367.64, -29317.34)
			Constant	11553.46 (10240.54, 13244.74)	1.03E-5 (8.66E-6, 1-21E-5)	-28103.28 (-28122.22, -28086.40)	-29349.00 (-29375.42, -29323.36)
			Skyline	11187.43 (9873.84, 12575.83)	1.08E-5 (9.07E-6, 1.25E-5)	-28102.45 (-28120.45, -28085.73)	-29344.45 (-29372.69, -29318.07)
		Relaxed-log	Exponential	7913.17 (6980.99, 9748.39)	1.96E-5 (1.19E-5, 2.81E-5)	-27744.36 (-27768.52, -27721.66)	-28926.25 (-28978.13, -28872.994)
			Constant	9171.22 (7043.43, 13521.29))	2.62E-5 (1.50E-5, 3.98E-5)	-27743.42 (-27767.37, -27720.91)	-28894.34 (-28956.04, -28833.88)
			Skyline	8824.31 (7040.62, 12155.6)	2.04E-5 (1.45E-5, 2.71E-5)	-27743.89 (-27767.43, -27720.86)	-28916.19 (-28962.38, -28869.94)
	b)
		Clade	Median MRCA ybp (95% HPD interval)
			Strict, Exponential	Strict, Constant	Strict, Skyline	Relaxed-log, Exponential	Relaxed-log, Constant	Relaxed-log, Skyline
		Genotype 1	7221.81 (70005.97, 7515.68)	7245.25 (7012.39, 7551.84)	7194.18 (6979.37, 7462.72)	7230.44 (69929.16, 7807.76)	7382.5 (6913.14, 8373.09)	7356.44 (6940.73, 8163.19)
		Genotype 2	2192.84 (1897.14, 2654.23)	2219.73 (1891.33, 2700.34)	2106.48 (1829.22, 2509.54)	1878.53 (1473.94, 2504.52)	1749.47 (1414.54, 2280.52)	1720.87 (1438.26, 2142.25)
		Genotype 3	3585.49 (3017.15, 4207.02)	3642.21 (3045.81, 4333.63)	3464.5 (2946.47, 4107.33)	2350.11 (1412.72, 3526.24)	2046.43 (1066.98, 3466.39)	1932.92 (1205.45, 29899.18)
