# Supplementary material for: Ancient viral genomes reveal introduction of human pathogenic viruses into Mexico during the transatlantic slave trade
Source: eLife. 2021 Aug 5;10:e68612. doi: 10.7554/eLife.68612 (PMC8423449; doi:10.7554/eLife.68612)
Supplement: Supplementary file 2. — (A) Information for the human skeletal remains from which ancient viral genomes were recovered. (B) . 87 Sr/86 Sr in teeth (enamel) and bones in individuals HSJNC81 and HSJN240. Lix1, Lix2, and Res correspond to the leaching stages. Errors during measurement are presented as one standard deviation with the last two digits (1 sd = ± 1σabs). 1 SE(M) = 1 sd/square root n. n = number of runs per analysis. Sr concentrations were determined with the Isotope Dilution technique. ppm = parts per million. The Eimer and Amend (EuA) Sr standard was analyzed during teeth and bone measurements. The certified 87Sr/ 86Sr value of this standard is 0.7080 ± 0.0004 (Fairbairn et al., 1967).(C) . 87 Sr/86 Sr sources from West Africa and Trans Mexican Volcanic Belt (TMVB) used for calibration. Compilation of 87Sr/86Sr from West Africa for groups A (Liégeois et al., 1991), B (Bernard-Griffiths et al., 1988), C (Peucat et al., 2005), D (Ferrière et al., 2010), E (Fullgraf et al., 2013), and F (Sakyi et al., 2018) while G (Solís-Pichardo et al., 2017) correspond to the TMVB for isotopic comparison. [file elife-68612-supp2.xlsx]

## Sheet: 2A
	Information for the human skeletal remains from which ancient viral genomes were recovered
	Sample	Dental piece	Skeletal age (yr)	Substrate for 14C dating	14C Ages (BP +/- 1σ) CE	Sequencing run	Number of sequences before Adapterremoval and collapse R1 and R2	Total sequences collapsed	Mapped sequences Q25	After removing PCR clones	After removing paralogs	Endogenous content	Clonality	Positions covered at least once	Mapped reads average length	Depth coverage (x)	Reads in mt	Average depth in mt	Positions covered at least once in mt	mt Haplogroup	Quality	SNPs used for PCA
	HSJN81A	1st Molar (Maxillary Left)	24-34	NA	NA	MA1HF1SS12	5531111	4556308	211473	209011	208978	0.0458656	0.0116421	14844985	72.1322
						JW1HS1SS02	94059394	74949843	21031463	10317393	10314126	0.137614	0.509431	551386485	85.9973
						Merged runs					10523012			567107410		0.291384	24219	170.92	16473	L3d1b1	0.8821	757787
	HSJN240	1st Premolar (Maxillary Right)	35-50	Third proximal phalange (left hand)	408 +/- 30	MA1HF1SS22	7583456	6129685	709187	699506	699421	0.114104	0.0136508	56244672	82.7554
						MA1XC1SS77	16274472	12173939	3934518	402732	402650	0.0330748	0.897641	30177822	86.8421
						214a_MA1HF1SS05	5095331	4095018	741203	731828	731735	0.178689	0.0126484	57306935	80.0088
						214a_S1	244191057	182099284	35845959	33039391	33035754	0.181416	0.0782952	1661552854	80.7287
						214a_S1_pair1		51971246	12516001	11634663	11631734	0.223811	0.0704169	731332047	74.5187
						214a_S1_pair2		51971246	11781226	10943153	10940552	0.210512	0.0711363	697511387	74.9566
						Merged runs					57441846			2144305626		1.45528	25258	176.282	16401	L2a1b1a	0.9739	801620
	HSJN194	1st Molar (Maxillary Left)	35-50	Third proximal phalange (left hand)	356 +/- 30	MA1HF1SS13	6031408	4815658	36553	36192	36188	0.00751465	0.00987607	2867747	80.4915
						194_S9	29854756	19450722	4218582	1617005	1616387	0.0831016	0.616695	134501524	96.1608
						MA1XC1SS73	18816671	1294388	3037022	46224	46214	0.0357034	0.98478	1420413	103.022
						Merged runs					1698789			140142382		0.0526882	24676	176.783	16351	L0a1b1a1	0.9475	27392
	COY4	1st Molar (Maxillary Right)	NA	NA	NA	C4	18900770	15470800	14409	14285	14270	0.000922383	0.00860573	1294915	90.9896
						C4_S1	8884482	7683225	172190	26748	26728	0.00347875	0.84466	803716	98.2381
						Merged runs					40998			2093485		0.00126742	18124	109.904	16539	B2	0.7228	13978

## Sheet: 2B
	87Sr/86Sr in teeth (enamel) and bones in individuals HSJNC81 and HSJN240.
	Sample	Lab code	Material	87Sr/86Sr	1 sd	1 SE(M)	n	weight (g)	Sr Concentration (ppm)
	Std EuA	SrT197	standard	0.708034	27	3	58
	81A crown Lix1	6231 MA ID	enamel	0.709419	37	5	52	0.00028	592
	81A crown Lix2	6231 MA ID	enamel	0.709508	27	4	57	0.00767	130
	81A crown Res	6231 MA ID	enamel	0.71098	32	4	56	0.10709	127.3
	81A parietal	6234 MA ID	bone	0.706718	32	4	58	0.11292	465.1
	240 crown Lix1	6232 MA ID	enamel	0.71092	41	6	47	0.00025	614.3
	240 crown Lix2	6232 MA ID	enamel	0.711024	29	4	56	0.00778	108
	240 crown Res	6232 MA ID	enamel	0.711093	33	4	59	0.05398	173
	240 phalange	6235 MA ID	bone	0.707553	36	5	57	0.03156	294.5

## Sheet: 2C
	87Sr/86Sr Sources from West Africa and Trans Mexican Volcanic Belt (TMVB) used for calibration.
	Group	Sample Nr	87Sr/86Sr	Source	Location
	A	WR [19564]	0.70988	Plutonic rock	Mali
		WR [19564]	0.71204	Plutonic rock	West African Craton (Mali)
	B	WR [17605]	0.7096	Carbonatite	Algeria
		WR [17605]	0.70972	Carbonatite	Algeria
		WR [17605]	0.70976	Carbonatite	Algeria
		WR [17605]	0.71007	Carbonatite	Algeria
		WR [17605]	0.71011	Carbonatite	Algeria
		WR [17605]	0.71125	Carbonatite	Algeria
		WR [17605]	0.71239	Syenite	Algeria
	C	WR [8695]	0.70935	Gabbro-diorite	West African Craton (Algeria)
		WR [8695]	0.71016	Gabbro	West African Craton (Algeria)
		WR [8695]	0.71148	Gabbro	West African Craton (Algeria)
	D	J493a	0.71183	Granitic-dike	Ghana
		J509a	0.70926	Granite	Ghana
		KR8-066	0.71049	Meta-greywacke	Ghana
		KR8-032	0.71163	Meta-greywacke	Ghana
	E	S007	0.71005	Mafic intrusive	Senegal
		S005	0.71087	Metavolcanic rock	Senegal
	F	12/449/01	0.70931	Basalt	West African Craton
		12/292/01	0.70957	Dolerite	West African Craton
	G	3475	0.708395	Soil	Mexico (Veracruz)
		3476	0.708286	Soil	Mexico (Veracruz)
		3477	0.706688	Soil	Mexico (Veracruz)
		3478	0.706323	Soil	Mexico (Veracruz)
		3479	0.706614	Soil	Mexico (Veracruz)
		3480	0.705869	Soil	Mexico (Veracruz)
