# Supplementary figures and images for: Ancient viral genomes reveal introduction of human pathogenic viruses into Mexico during the transatlantic slave trade
Source: eLife journal article supplement (doi:10.7554/elife.68612), 2021-08-05

COYC4

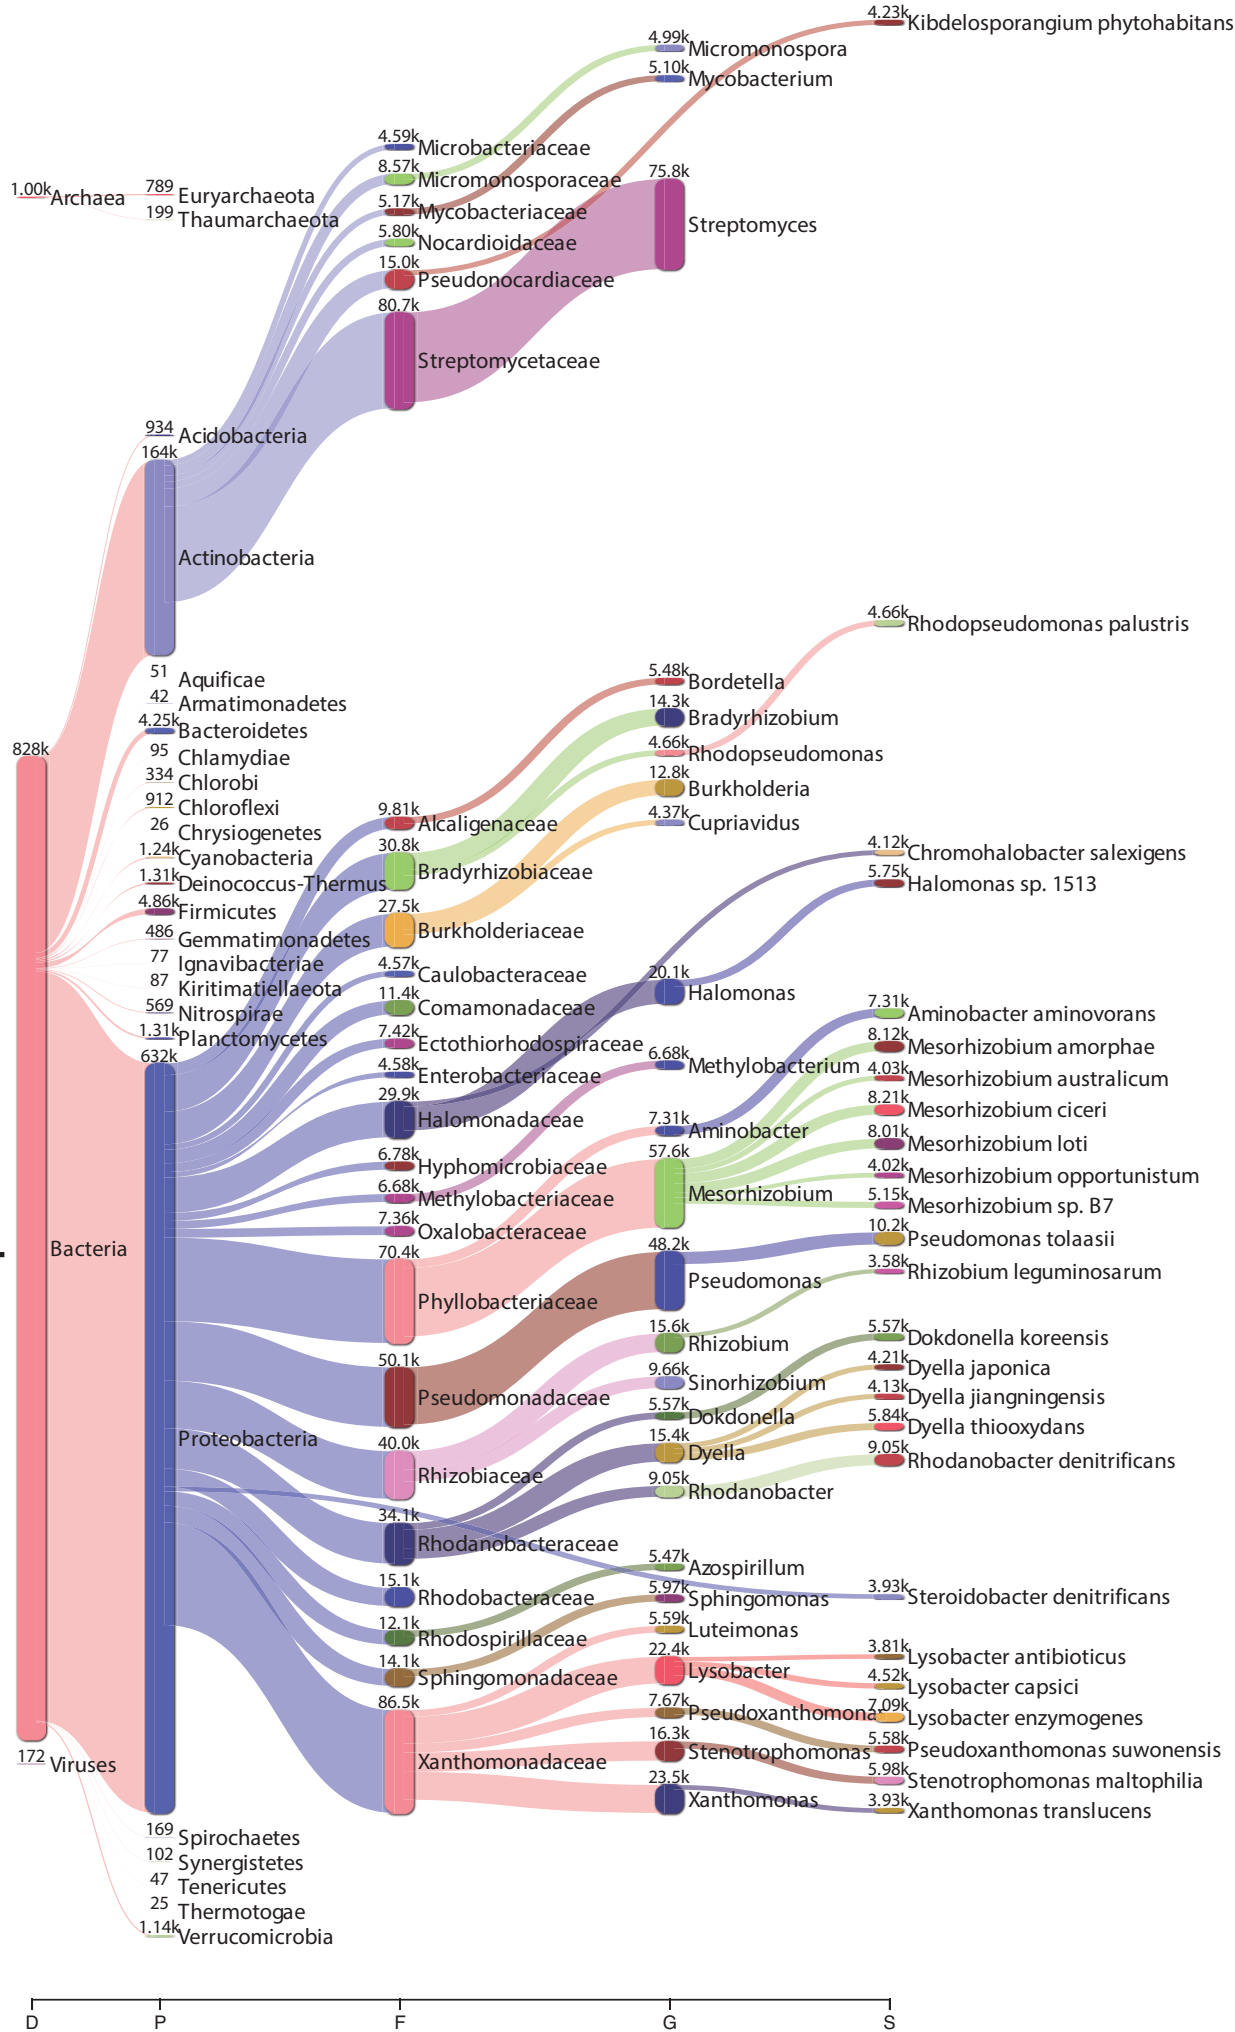

Supplement: supp [file elife-68612-supp-v1.zip]

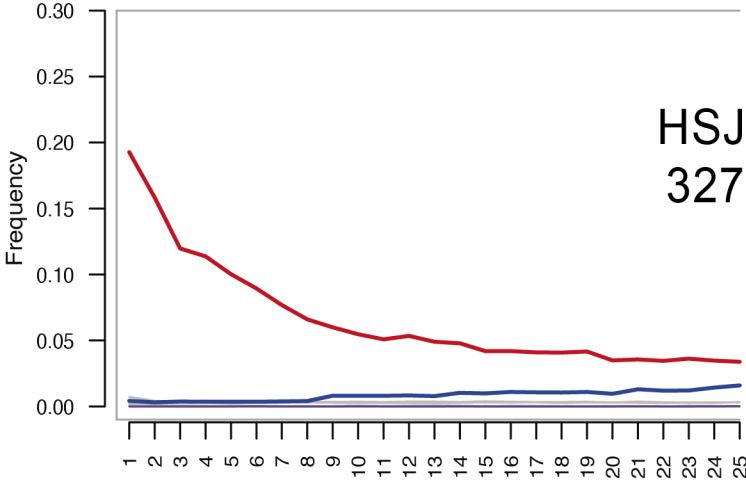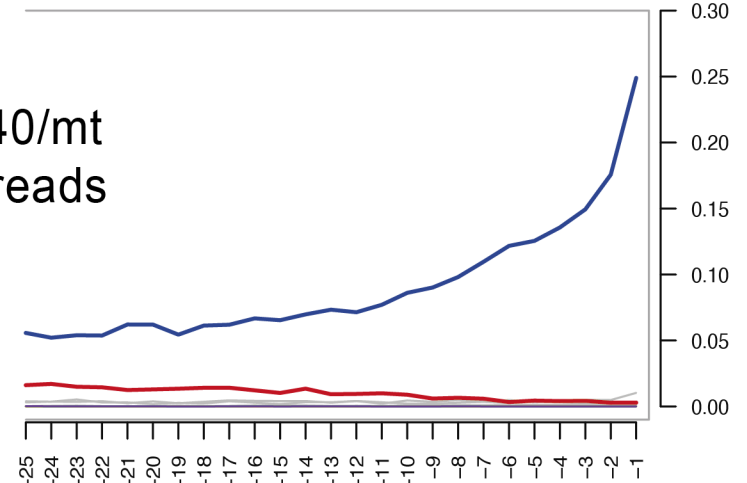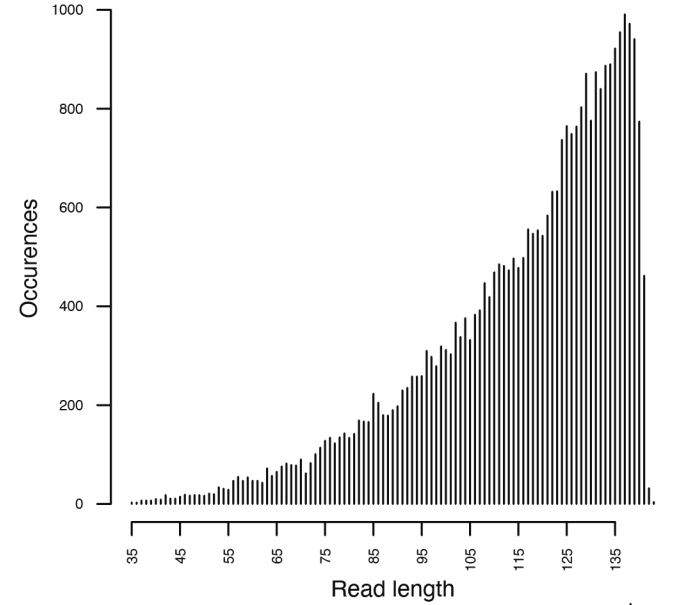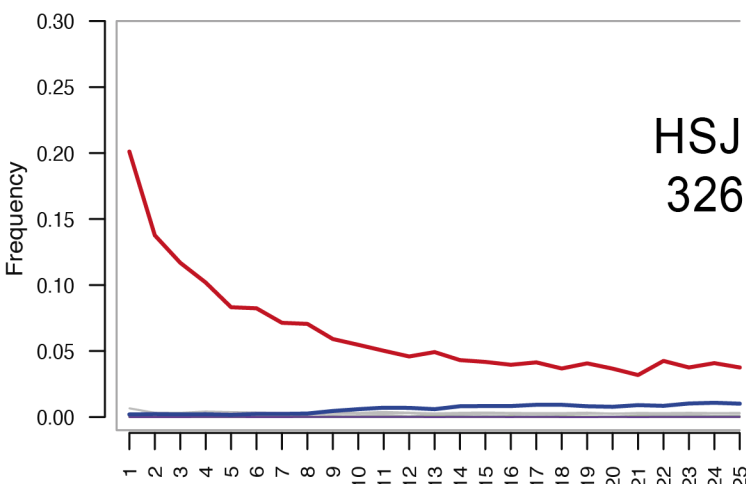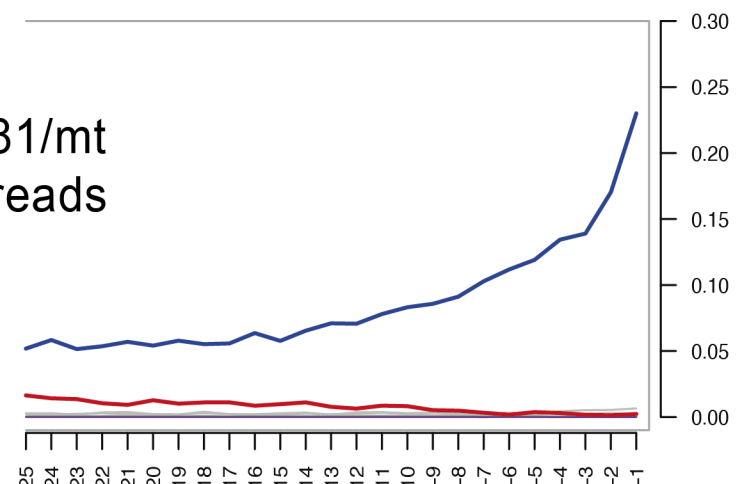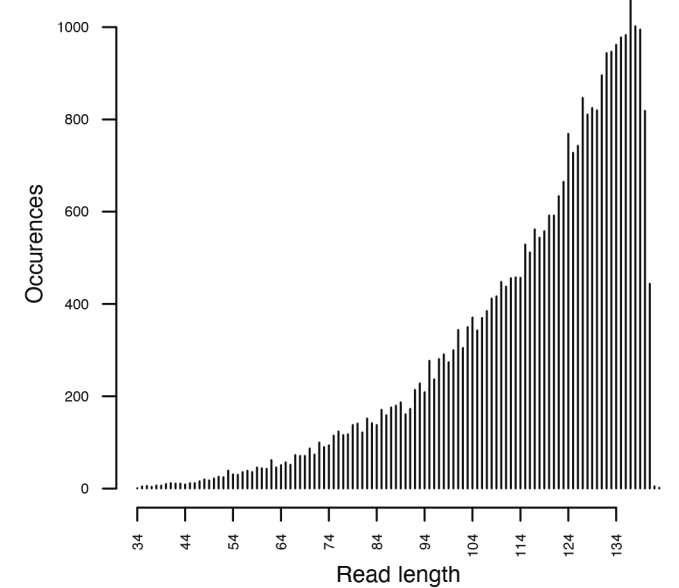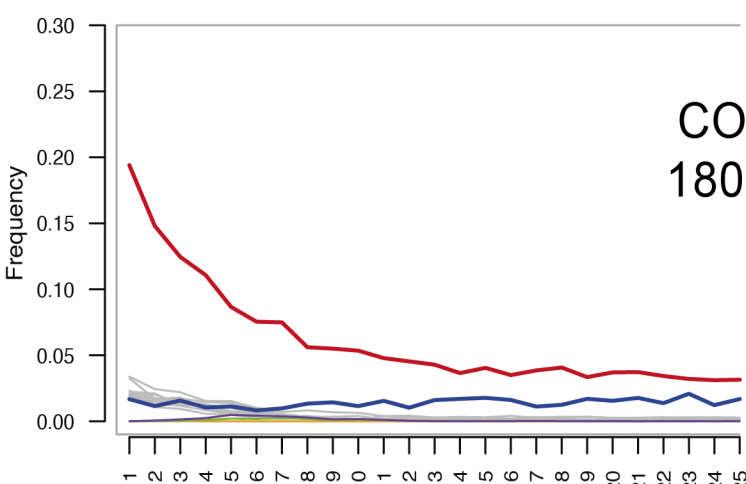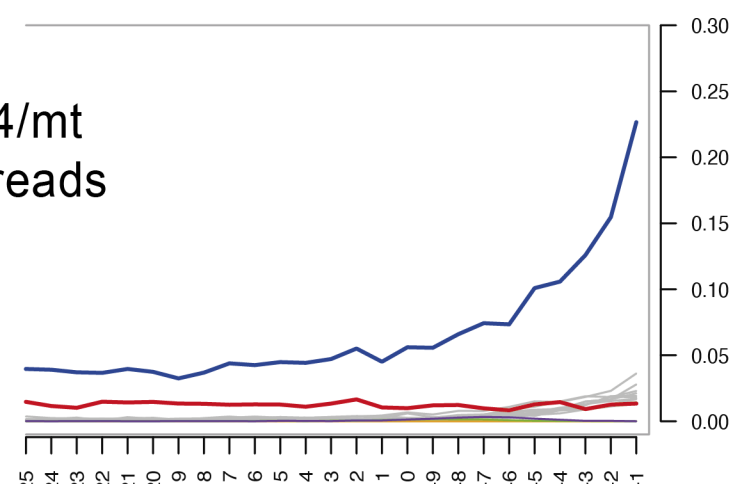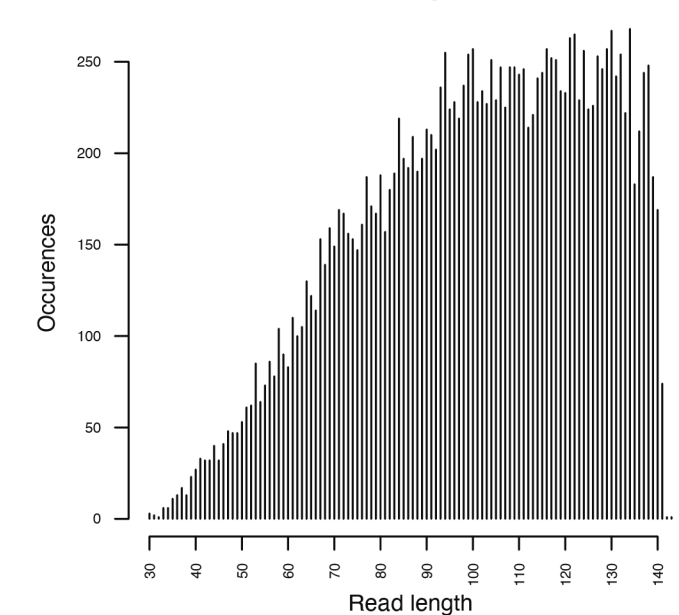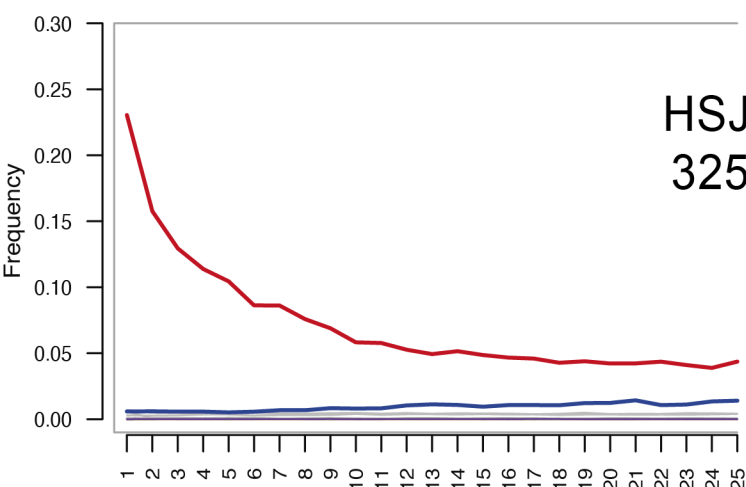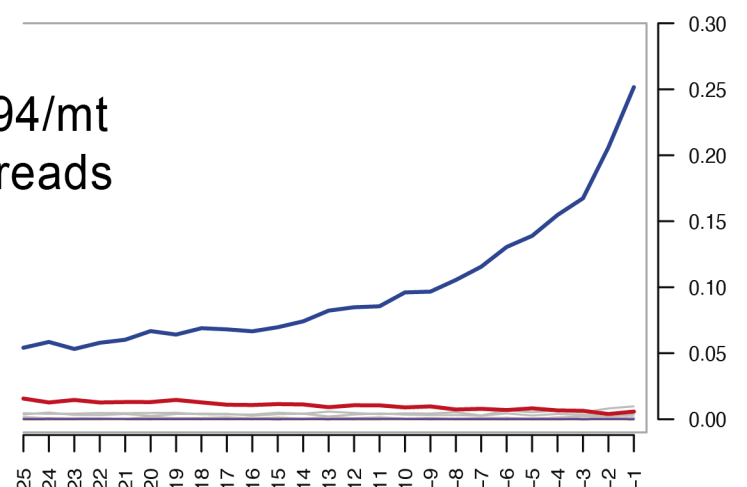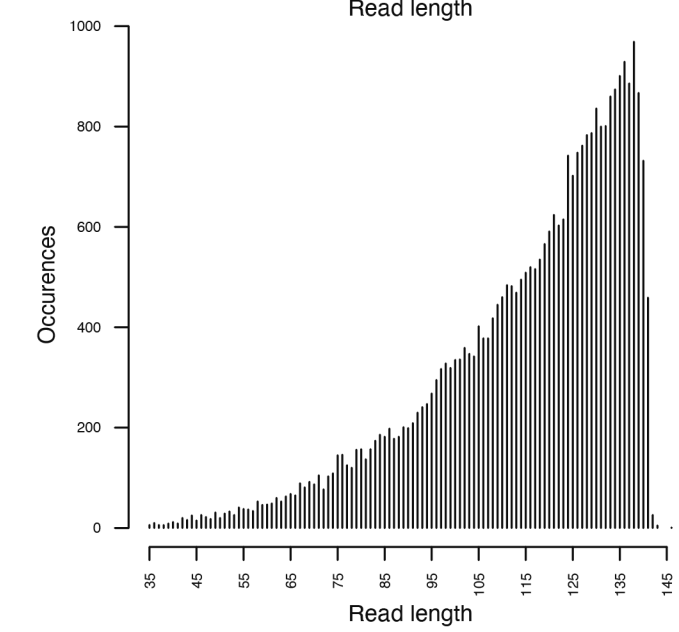

Supplement: supp [file elife-68612-supp-v1.zip]

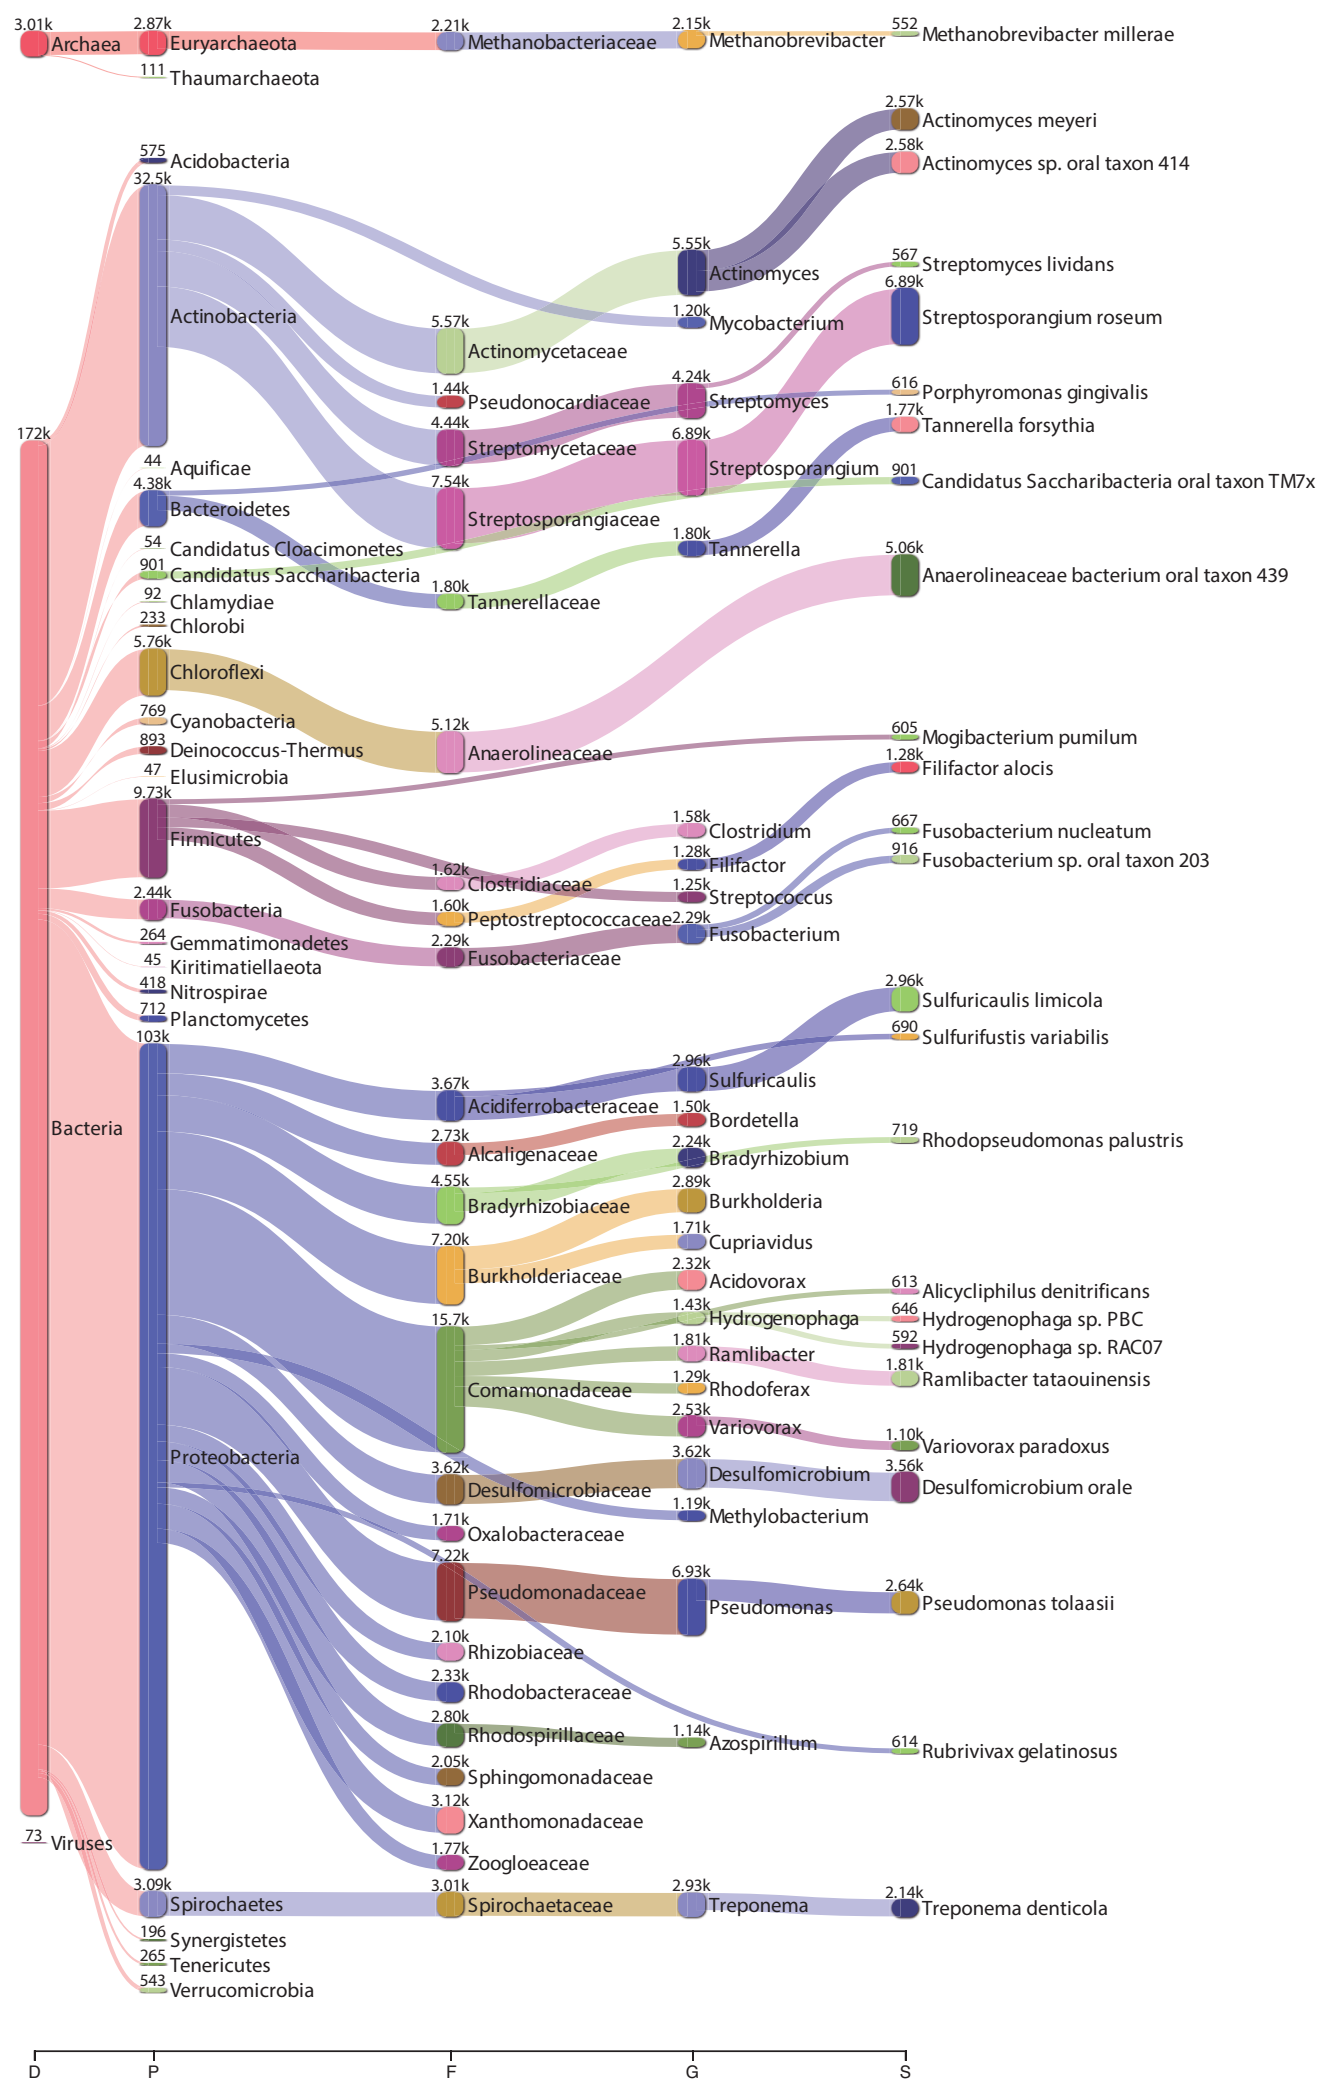

# HSJN240

Supplement: supp [file elife-68612-supp-v1.zip]

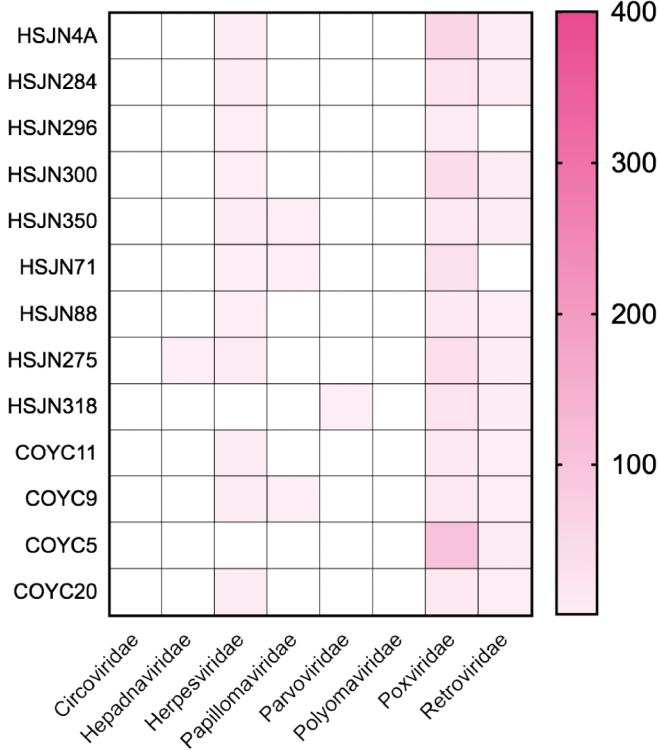

Supplement: supp [file elife-68612-supp-v1.zip]

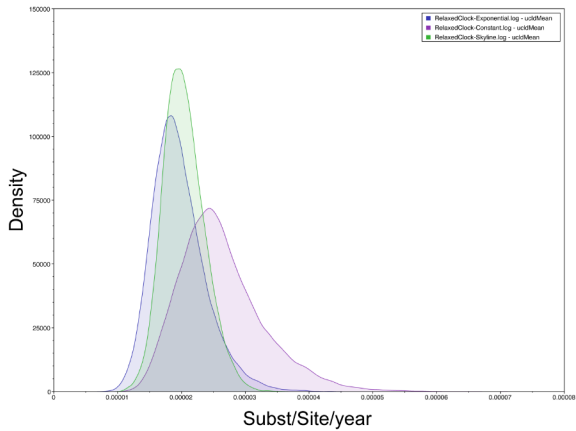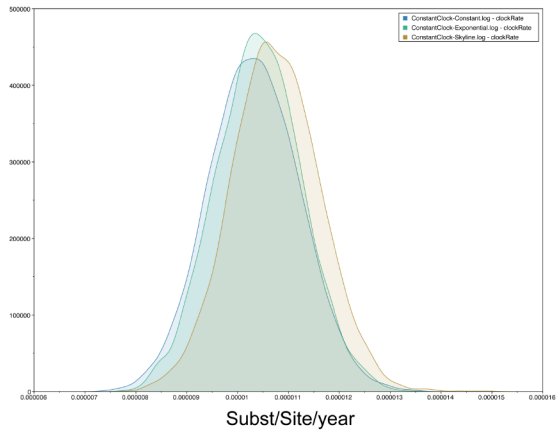

Supplement: supp [file elife-68612-supp-v1.zip]

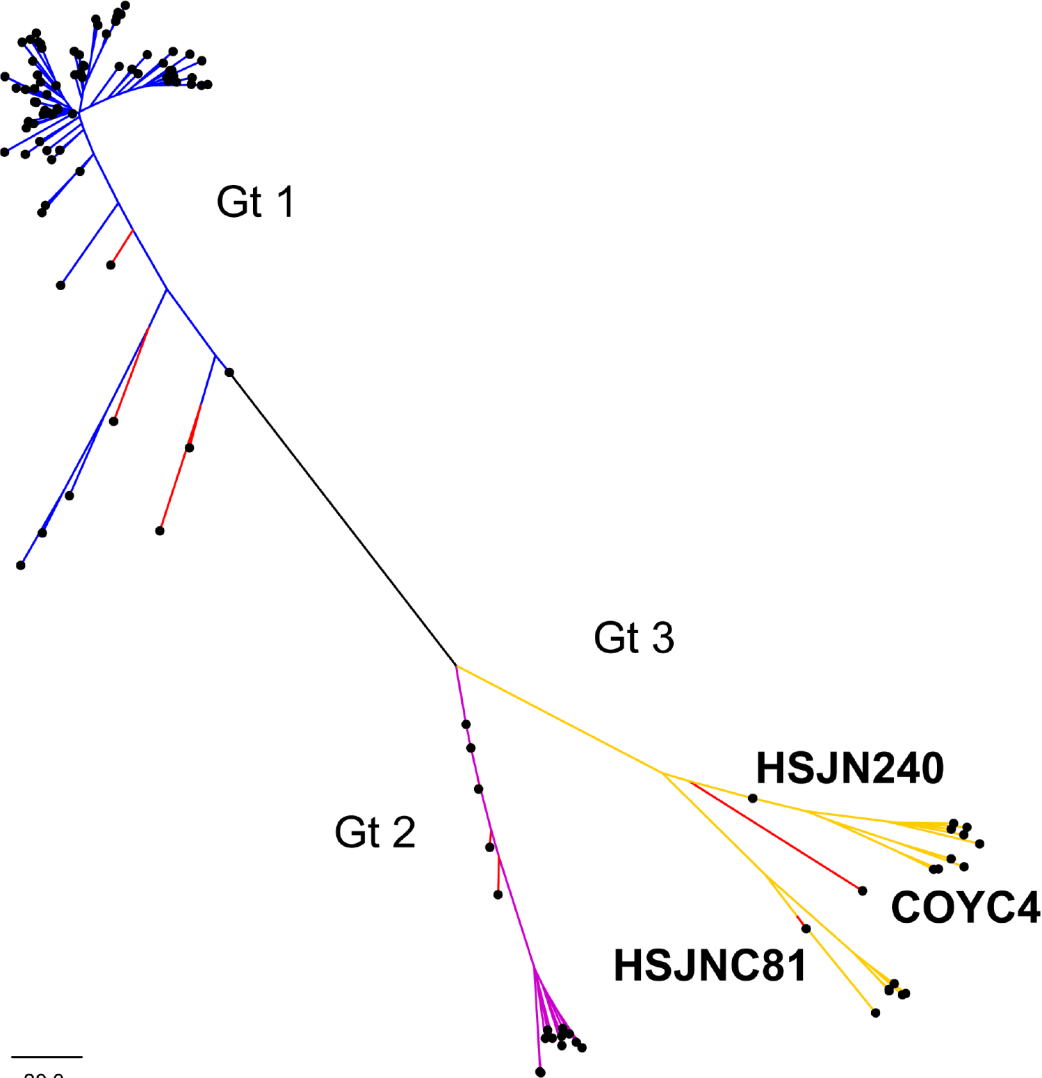

Supplement: supp [file elife-68612-supp-v1.zip]

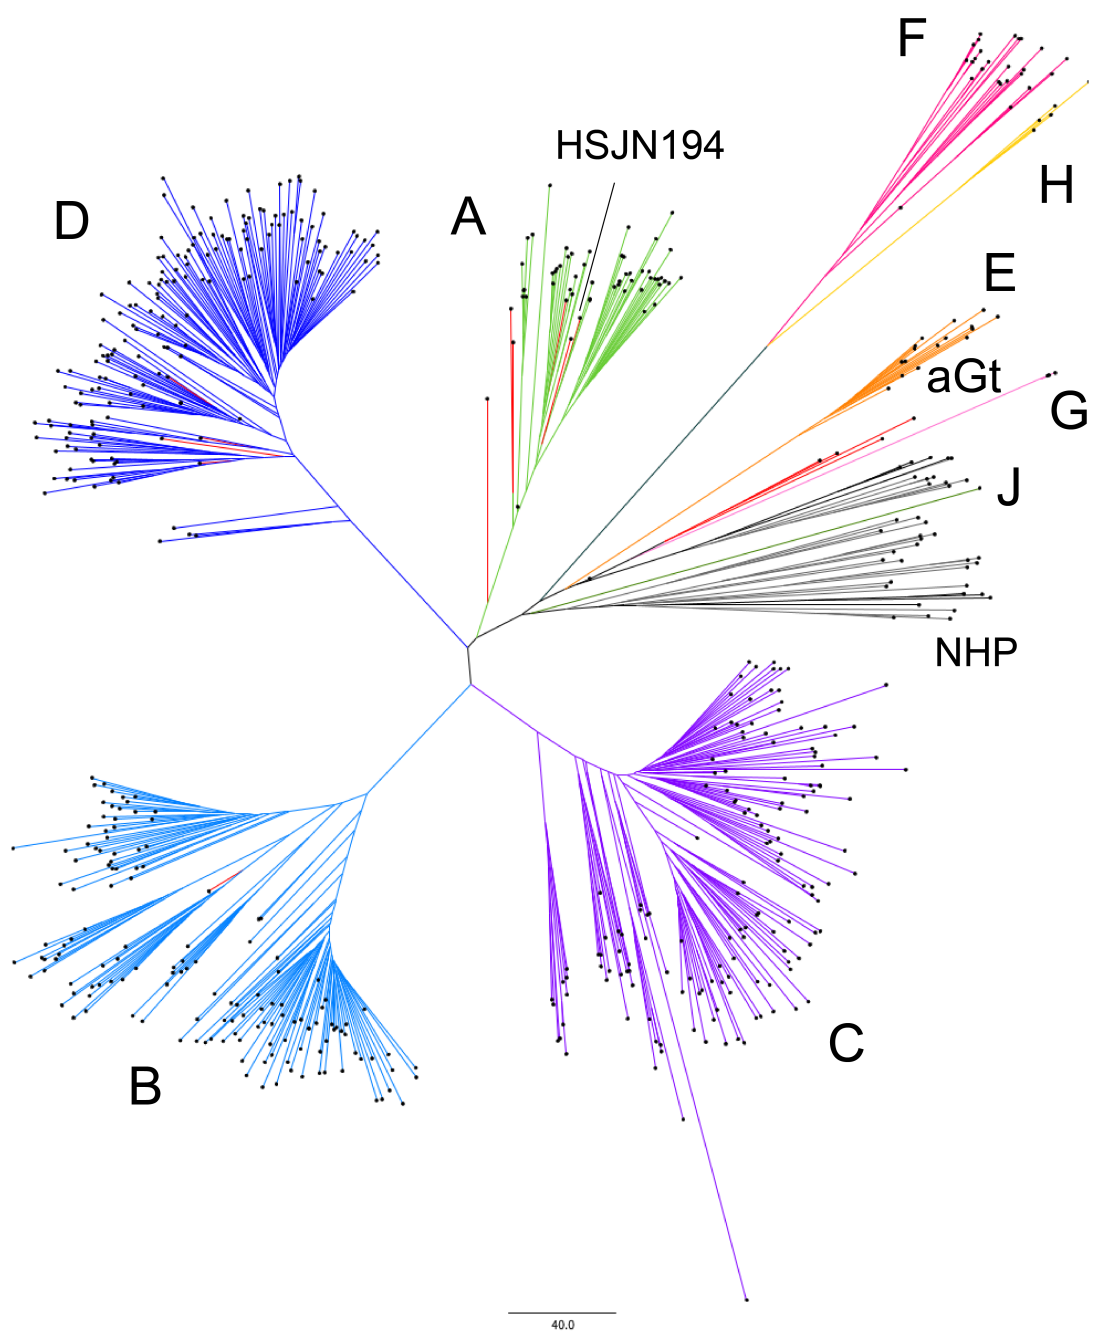

Supplement: supp [file elife-68612-supp-v1.zip]

a)

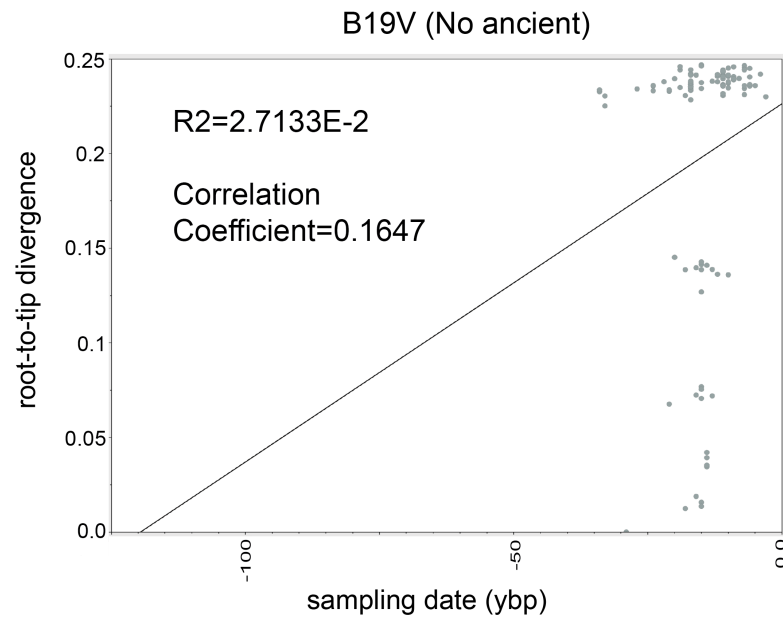

b)

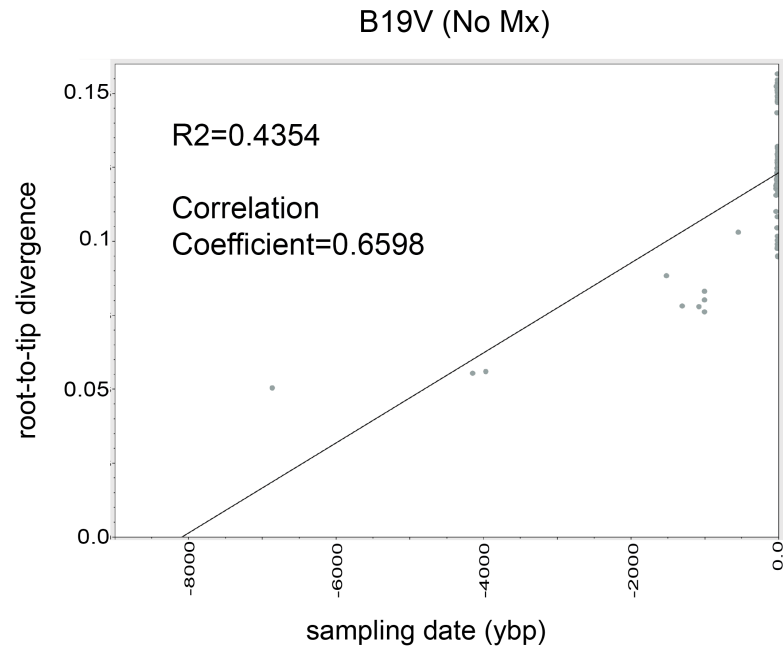

c)

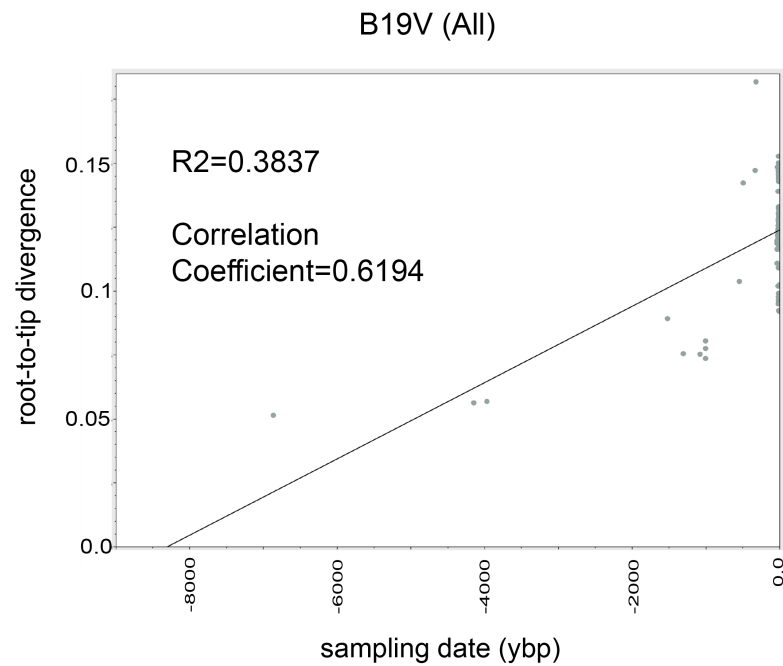

Supplement: supp [file elife-68612-supp-v1.zip]

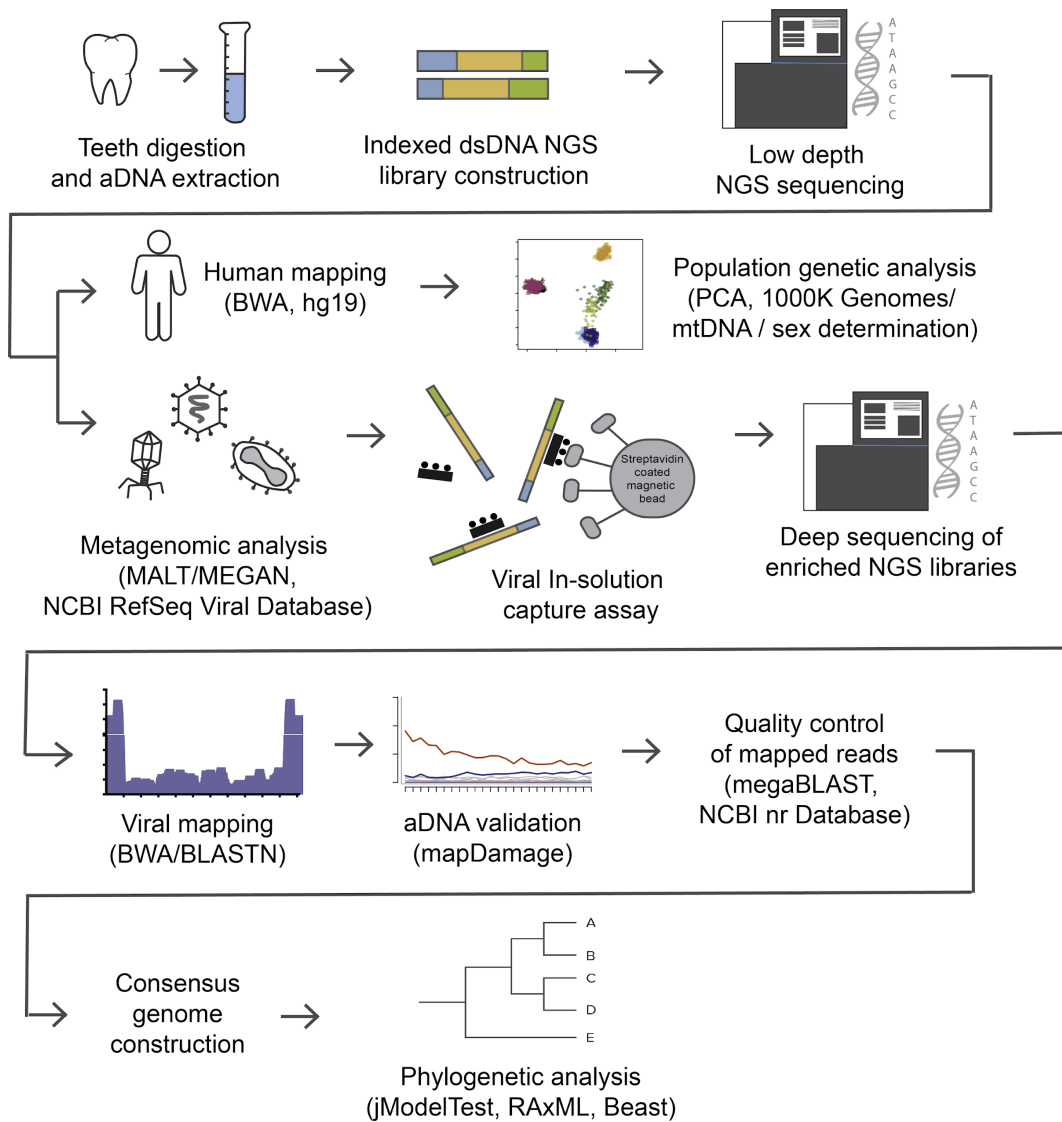

Supplement: supp [file elife-68612-supp-v1.zip]

a) HSJNC81

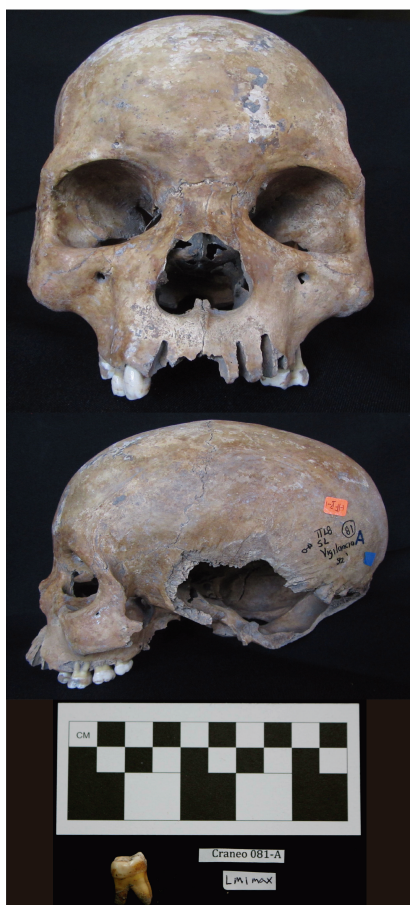

b) HSJN240

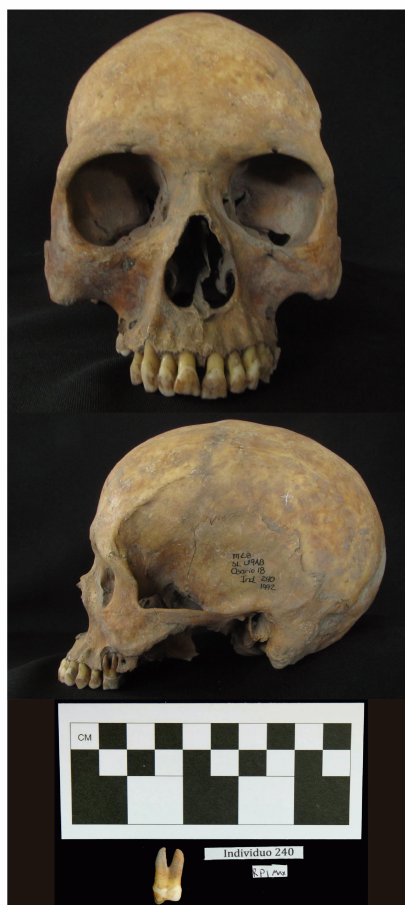

c) HSJN194

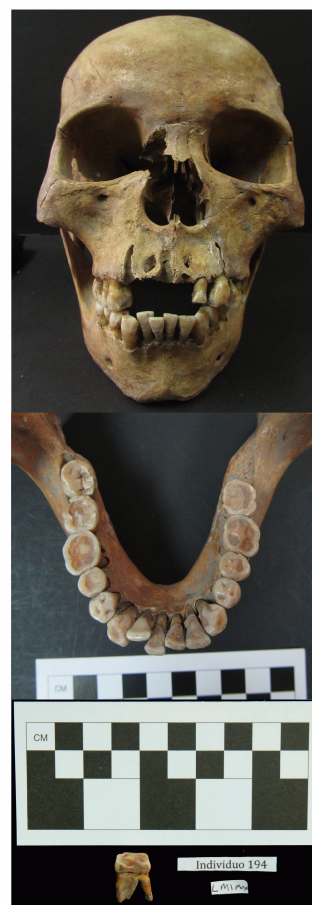

Supplement: supp [file elife-68612-supp-v1.zip]

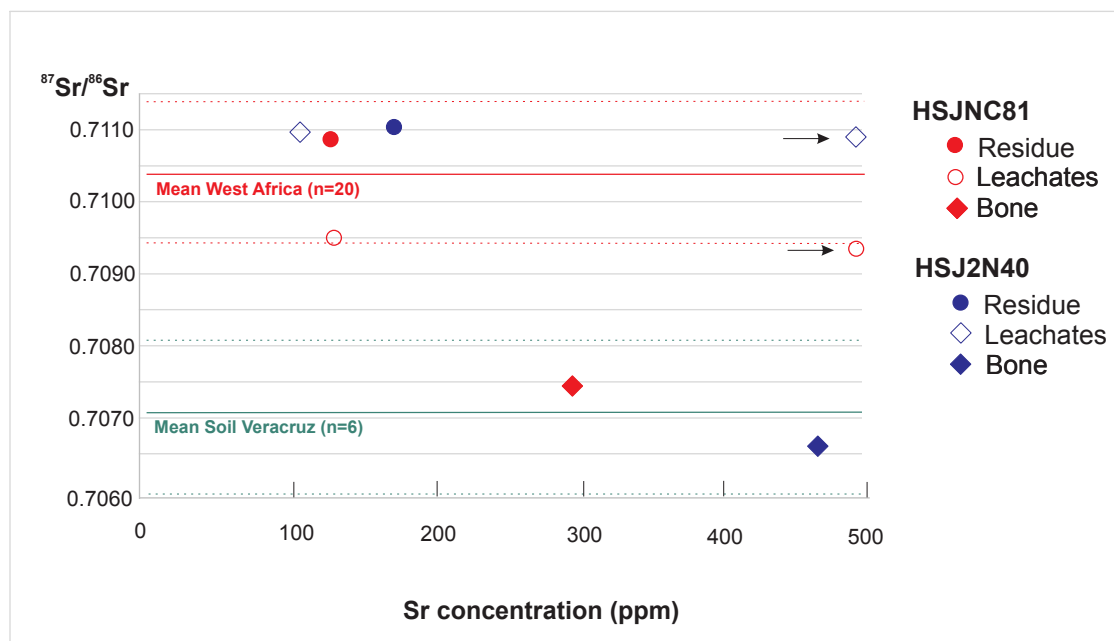

Supplement: supp [file elife-68612-supp-v1.zip]

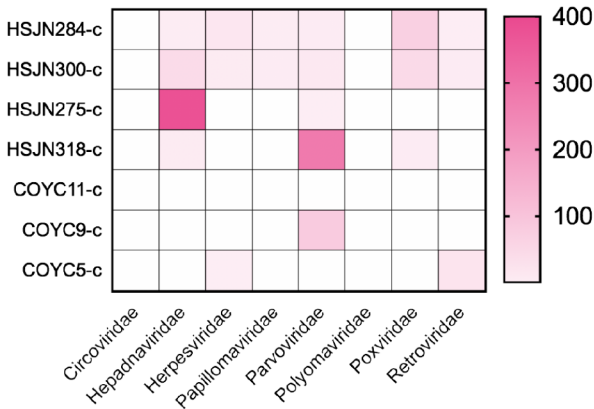

Supplement: supp [file elife-68612-supp-v1.zip]

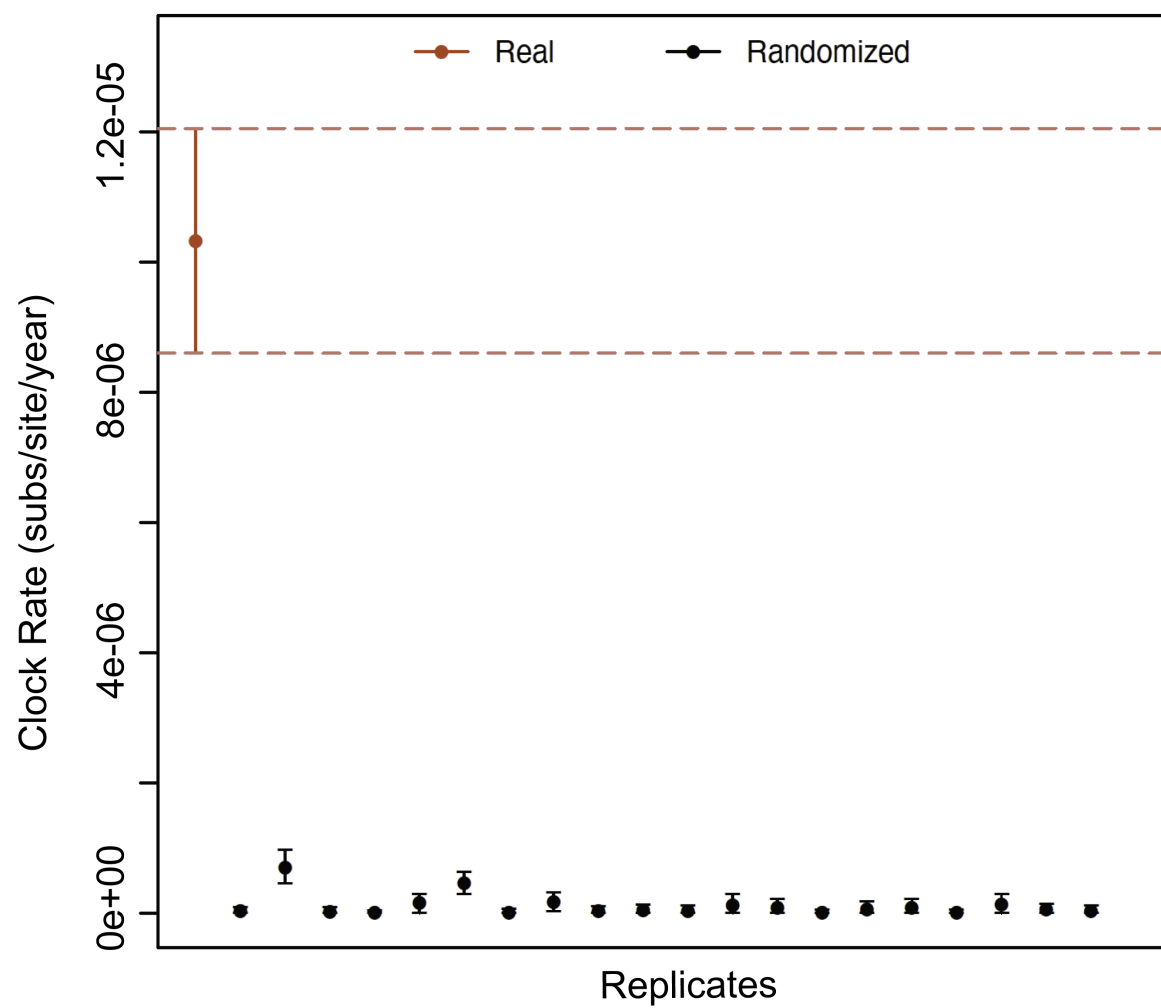

Supplement: supp [file elife-68612-supp-v1.zip]

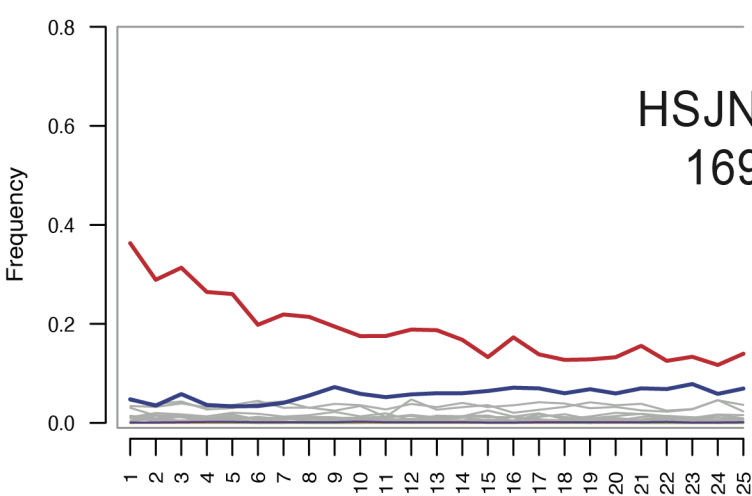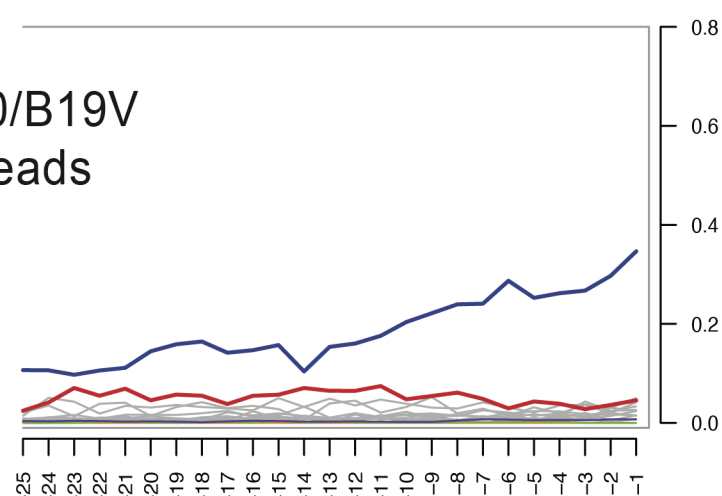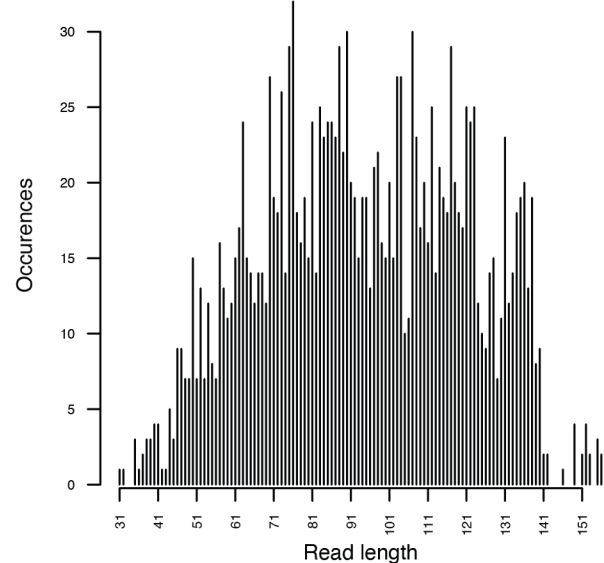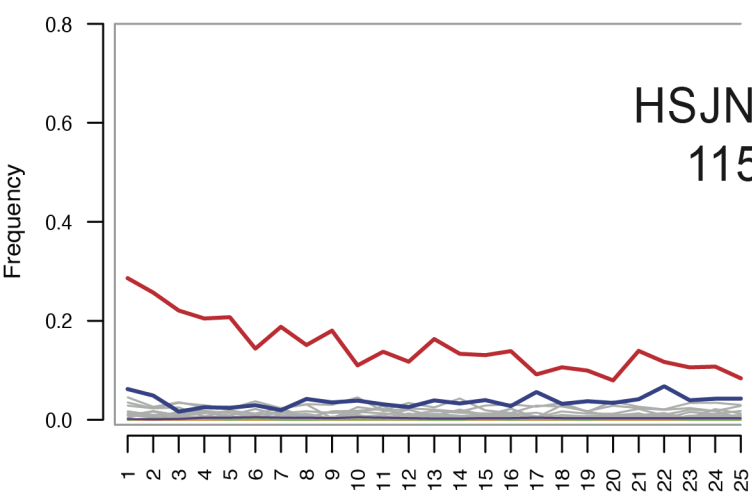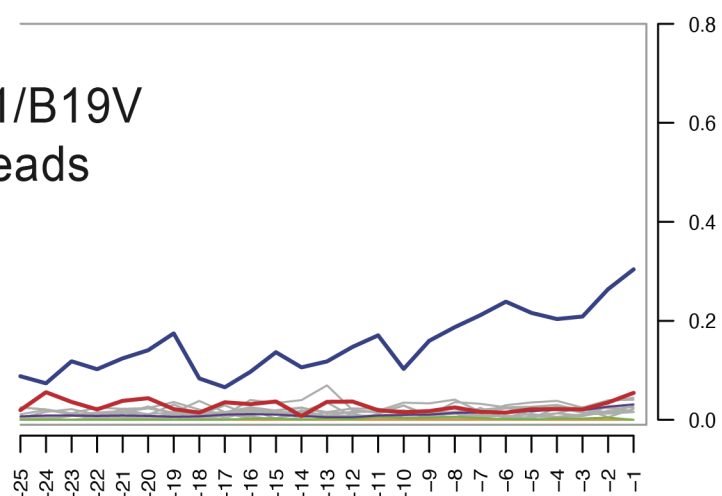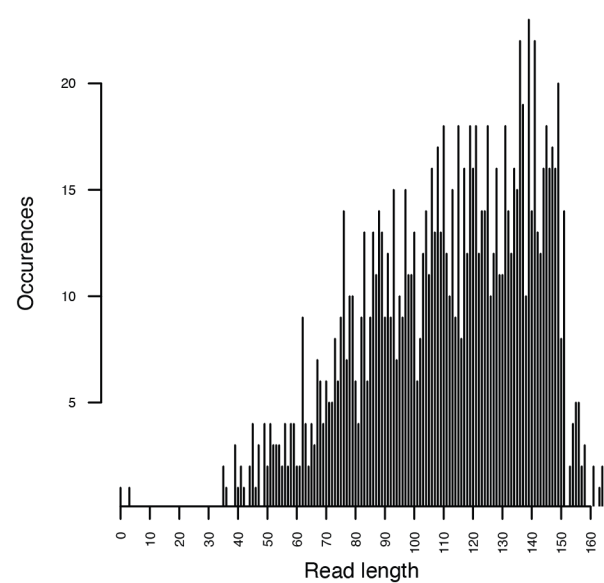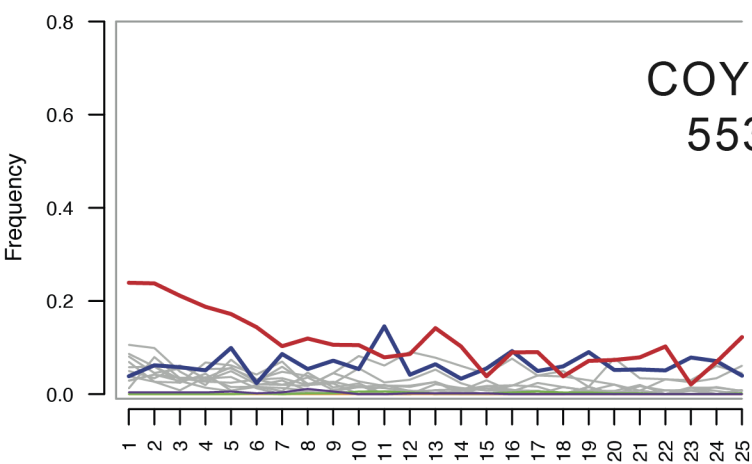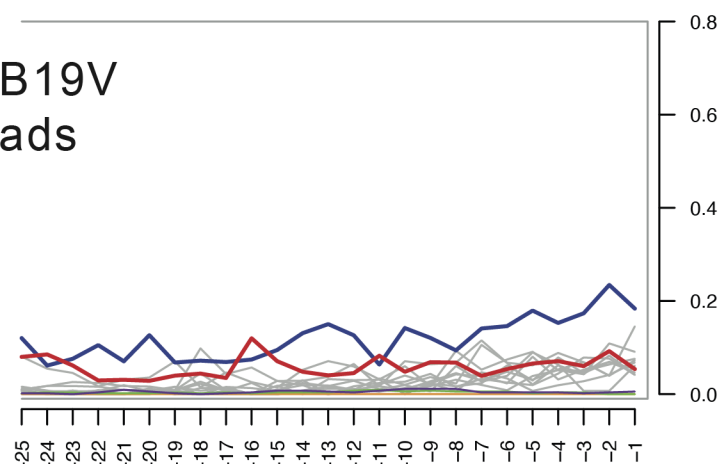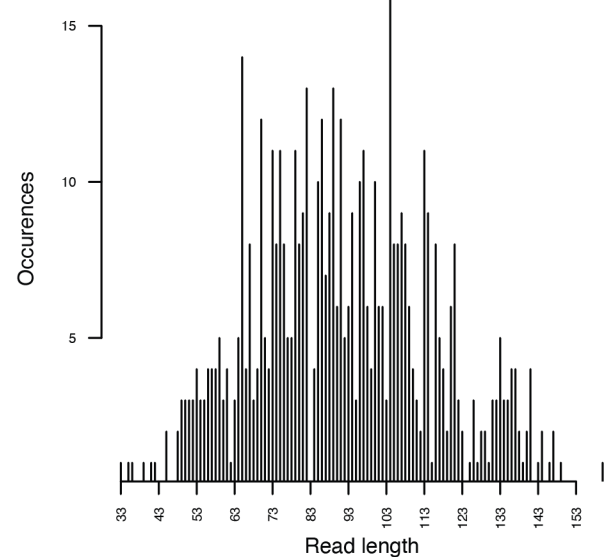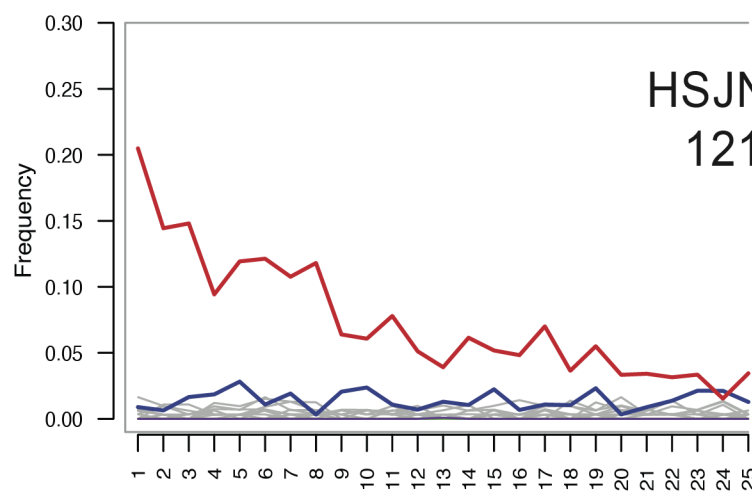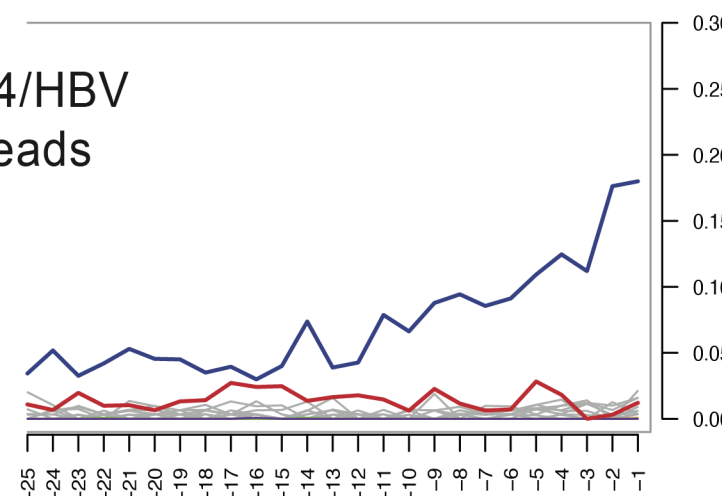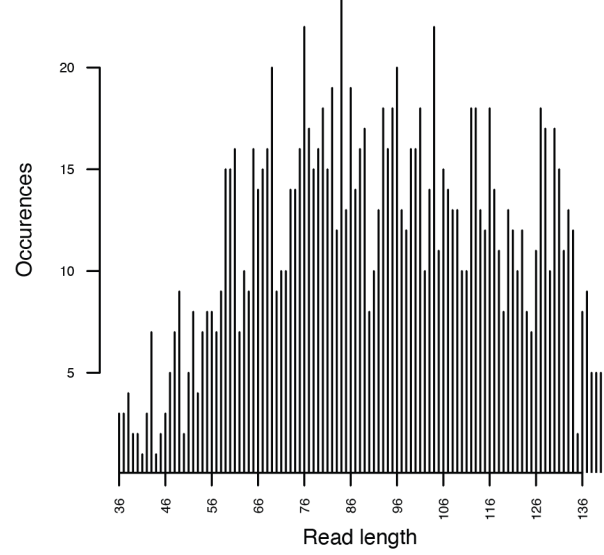

Supplement: supp [file elife-68612-supp-v1.zip]

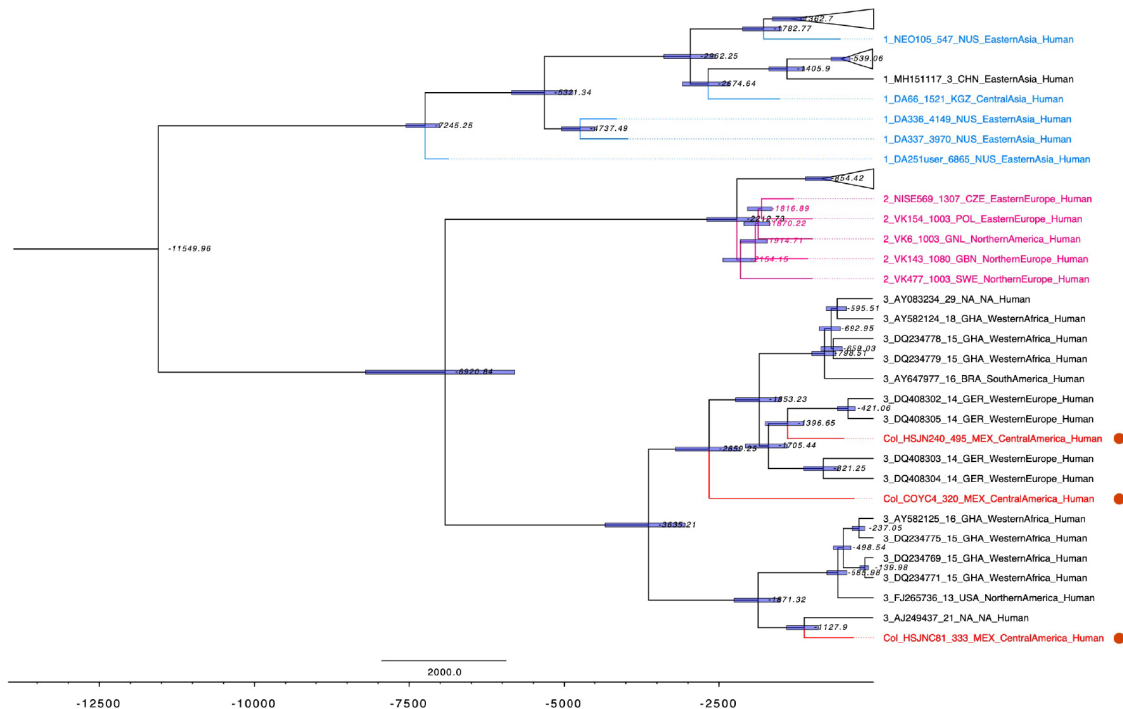

Supplement: supp [file elife-68612-supp-v1.zip]

a)

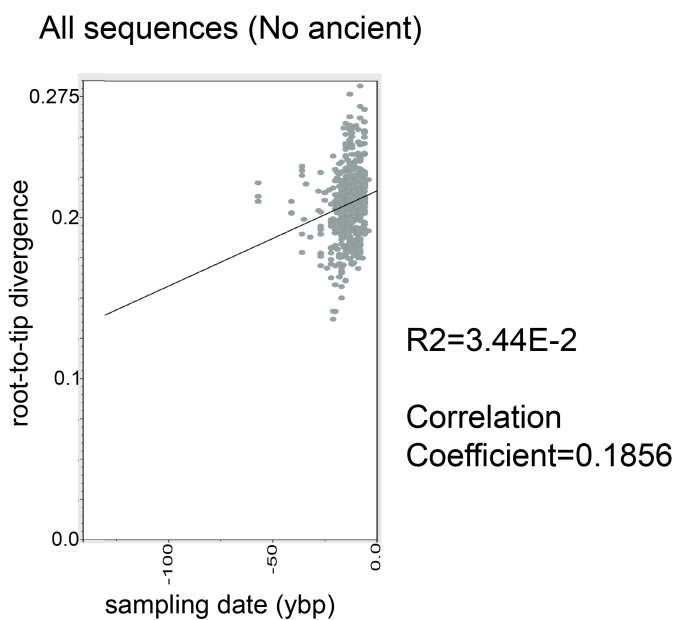

d)

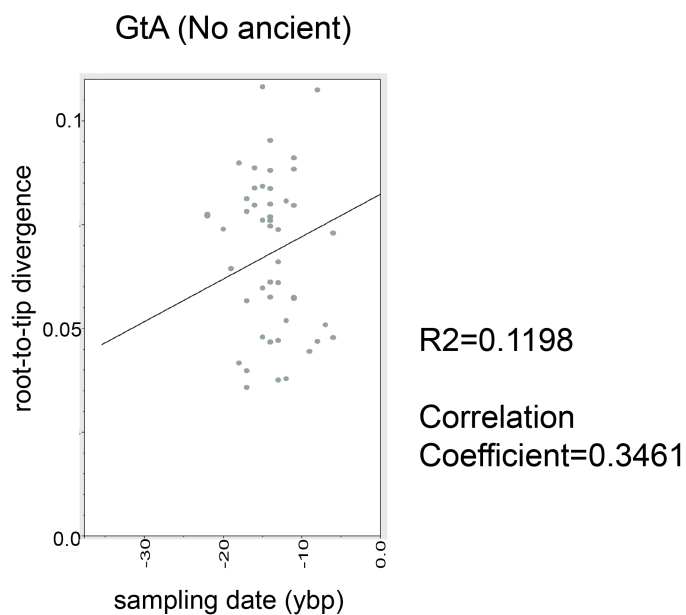

b)

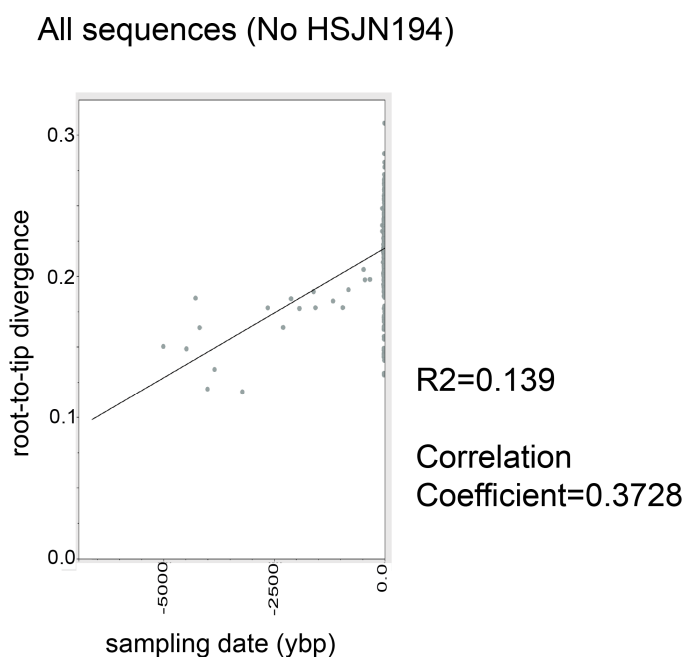

e)

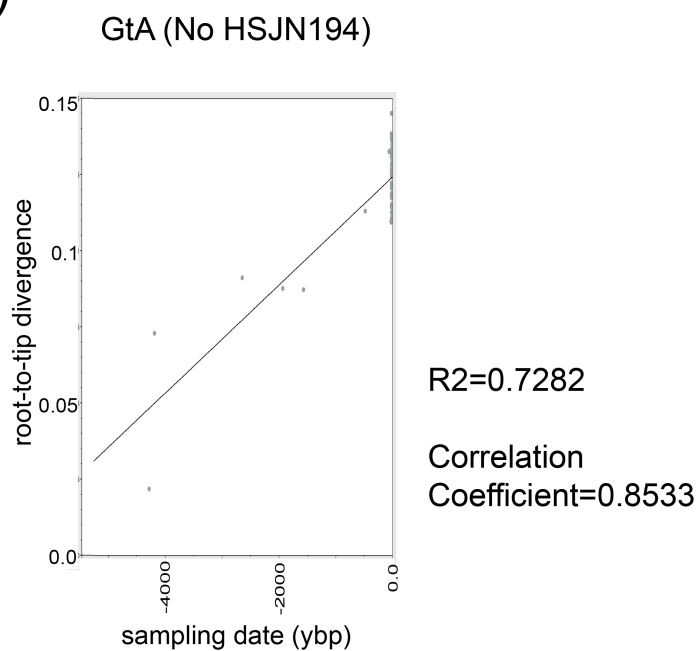

c)

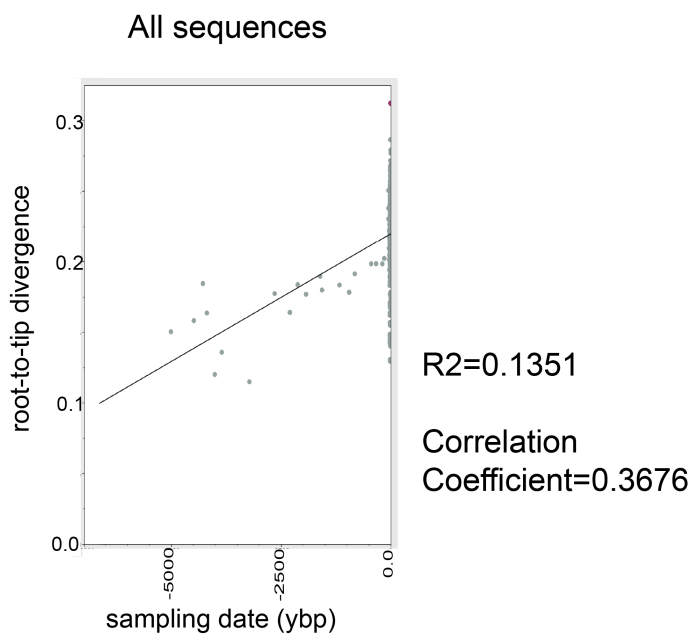

f)

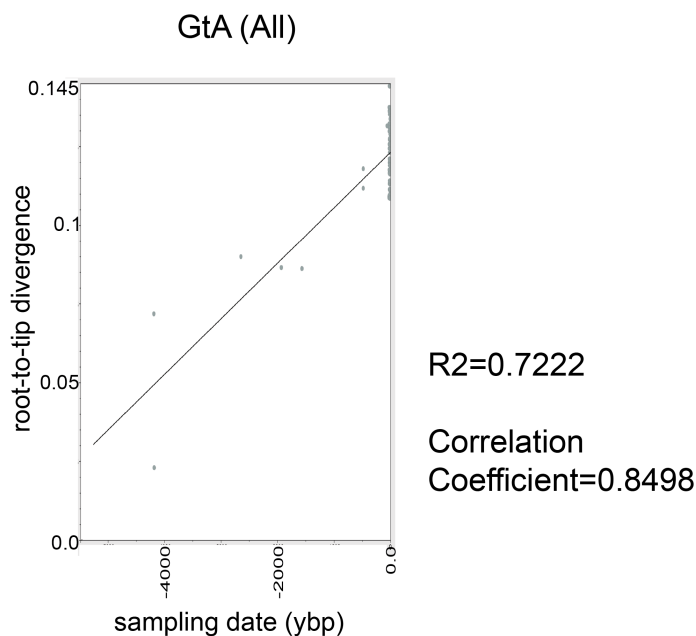

Supplement: supp [file elife-68612-supp-v1.zip]

HSJNC81

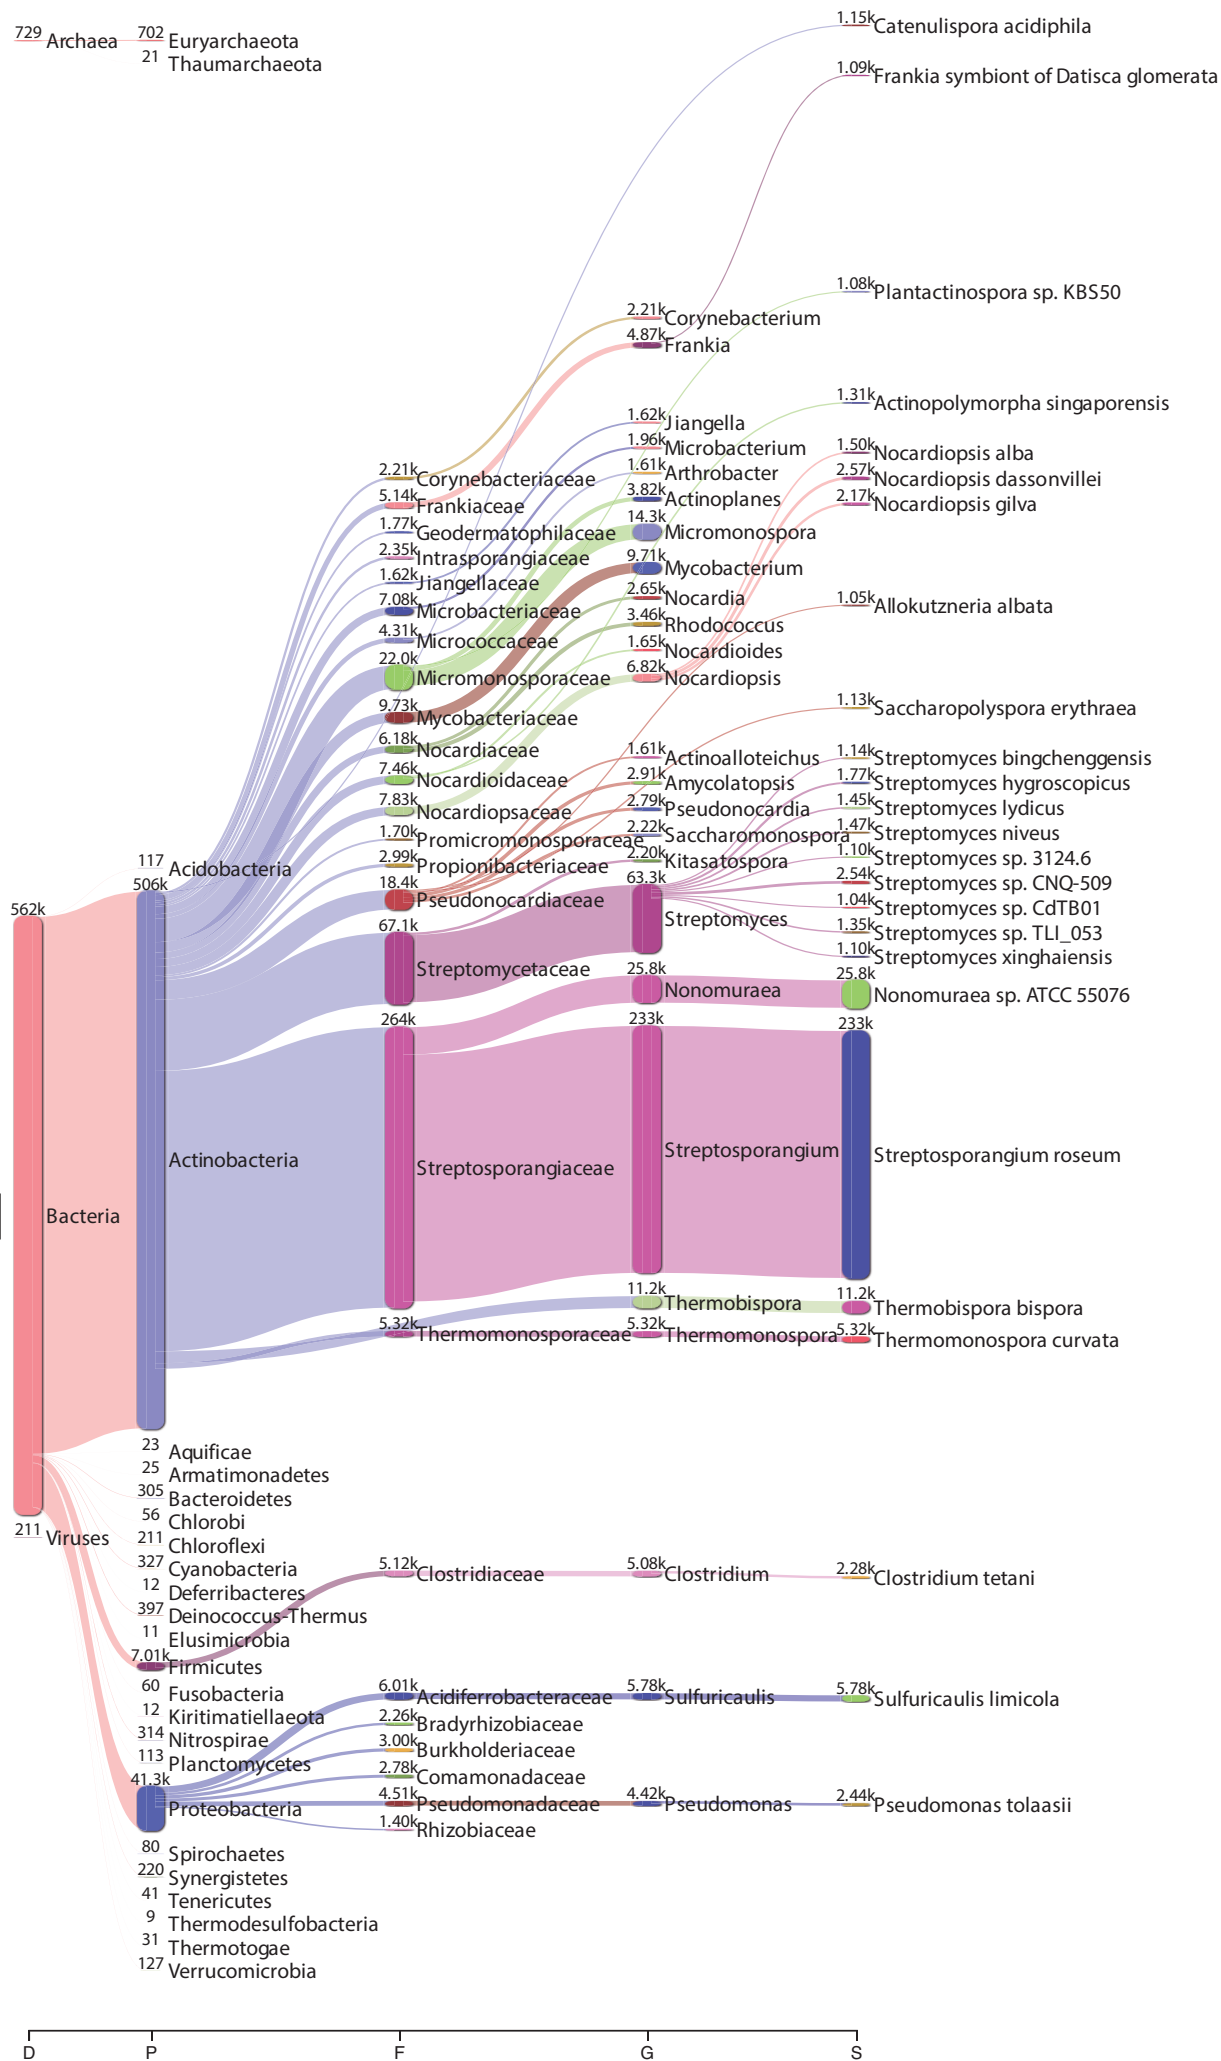

Supplement: supp [file elife-68612-supp-v1.zip]
